# Supplementary material for: Ruthenium(ii)-catalyzed decarbonylative and decarboxylative coupling of isatoic anhydrides with salicylaldehydes: access to aryl 2-aminobenzoates
Source: Royal Society of Chemistry journal article supplement (doi:10.1039/d1ob00027f), 2021-01-01
Supplement: d1ob00027f1.pdf [file d1ob00027f1.pdf]

# **Ruthenium(II)-Catalyzed Decarbonylative and Decarboxylative Coupling of Isatoic Anhydrides with Salicylaldehydes: Access to Aryl 2-Aminobenzoates**

Bidisha R. Bora, Rashmi Prakash, Sabera Sultana and Sanjib Gogoi\*

†Applied Organic Chemistry, Chemical Sciences & Technology Division, CSIR-North East  
Institute of Science and Technology, Jorhat-785006, AcSIR, Ghaziabad-201002, India

## **Supporting Information**

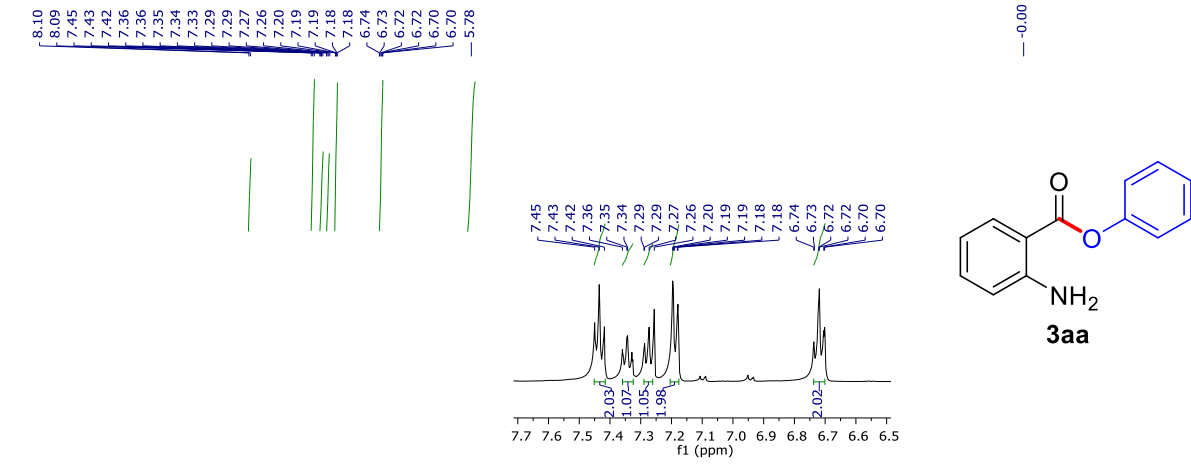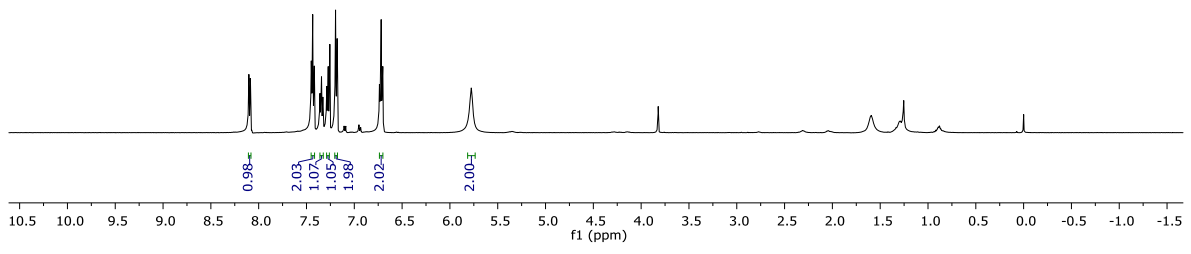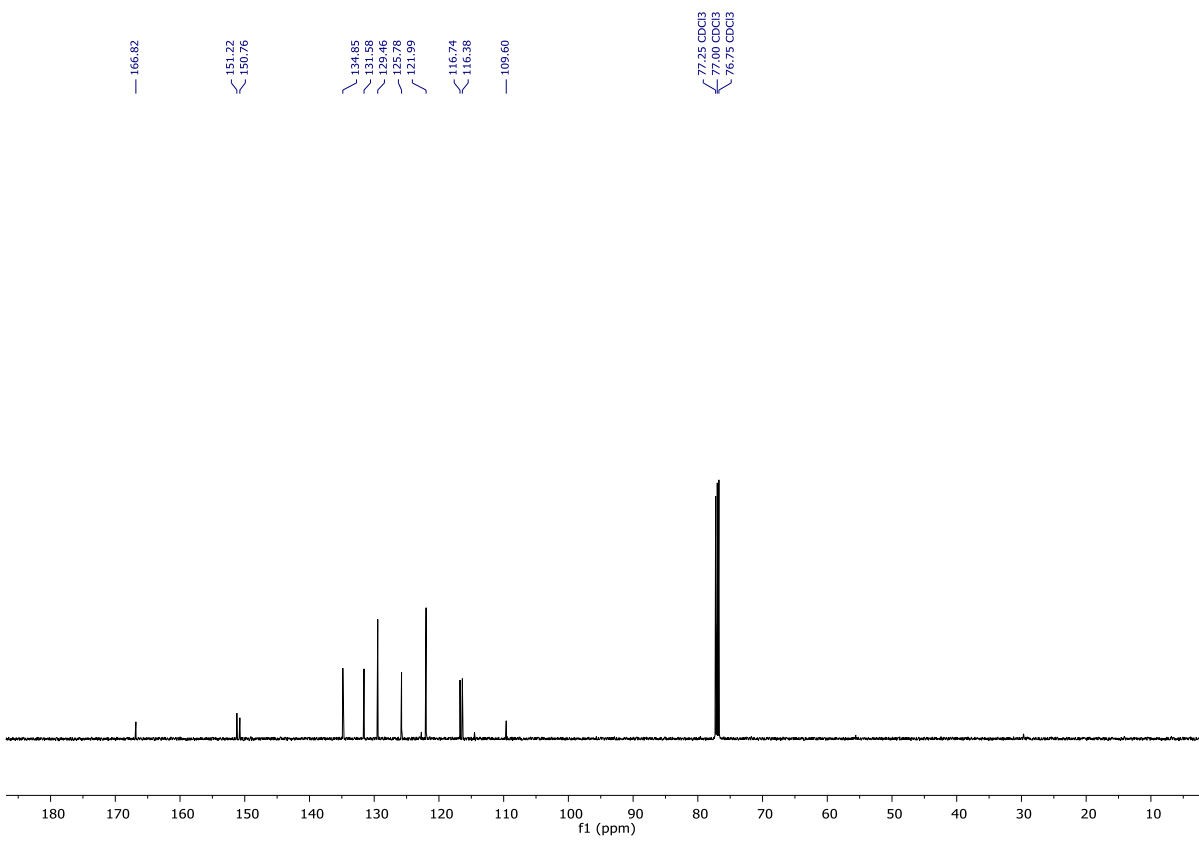

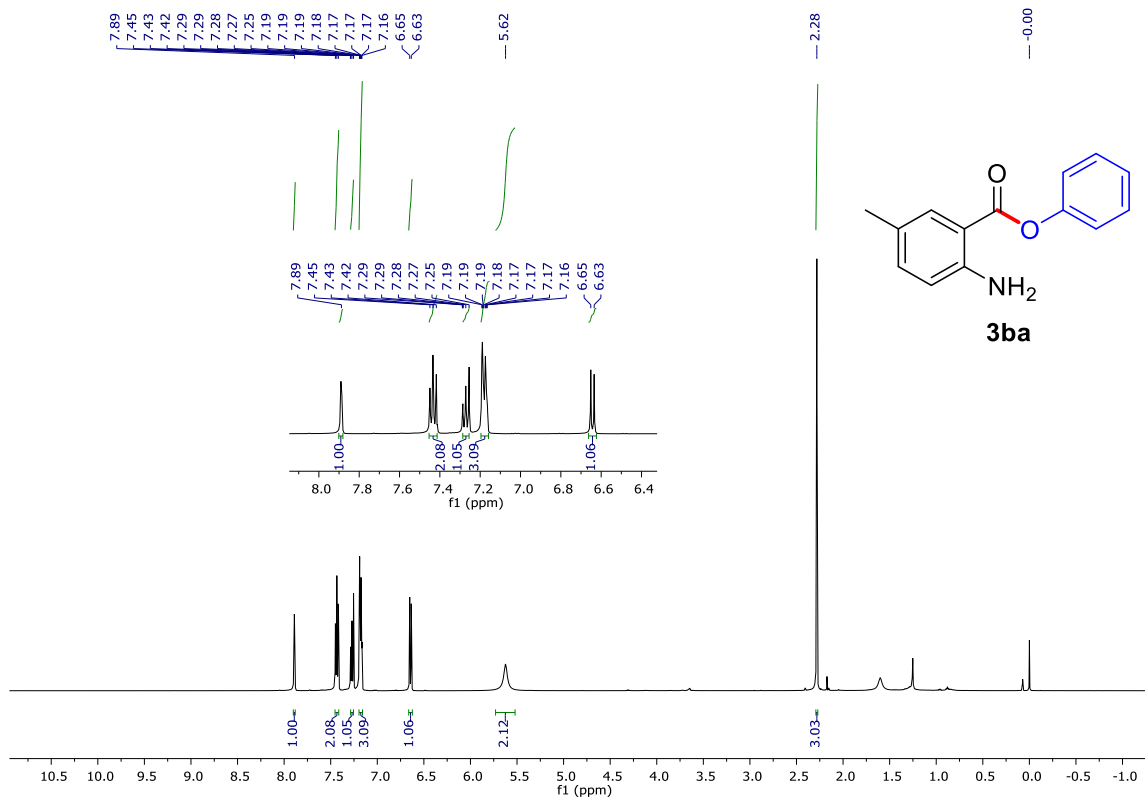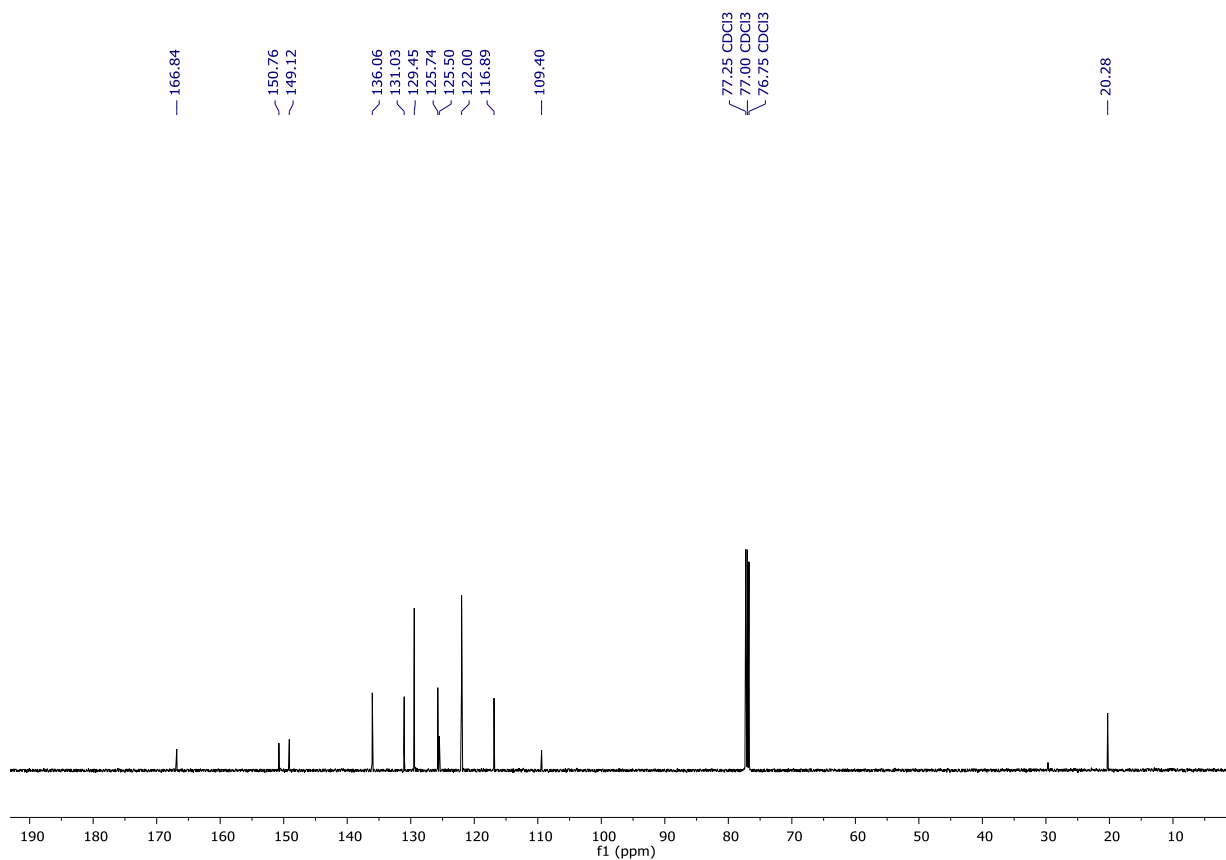

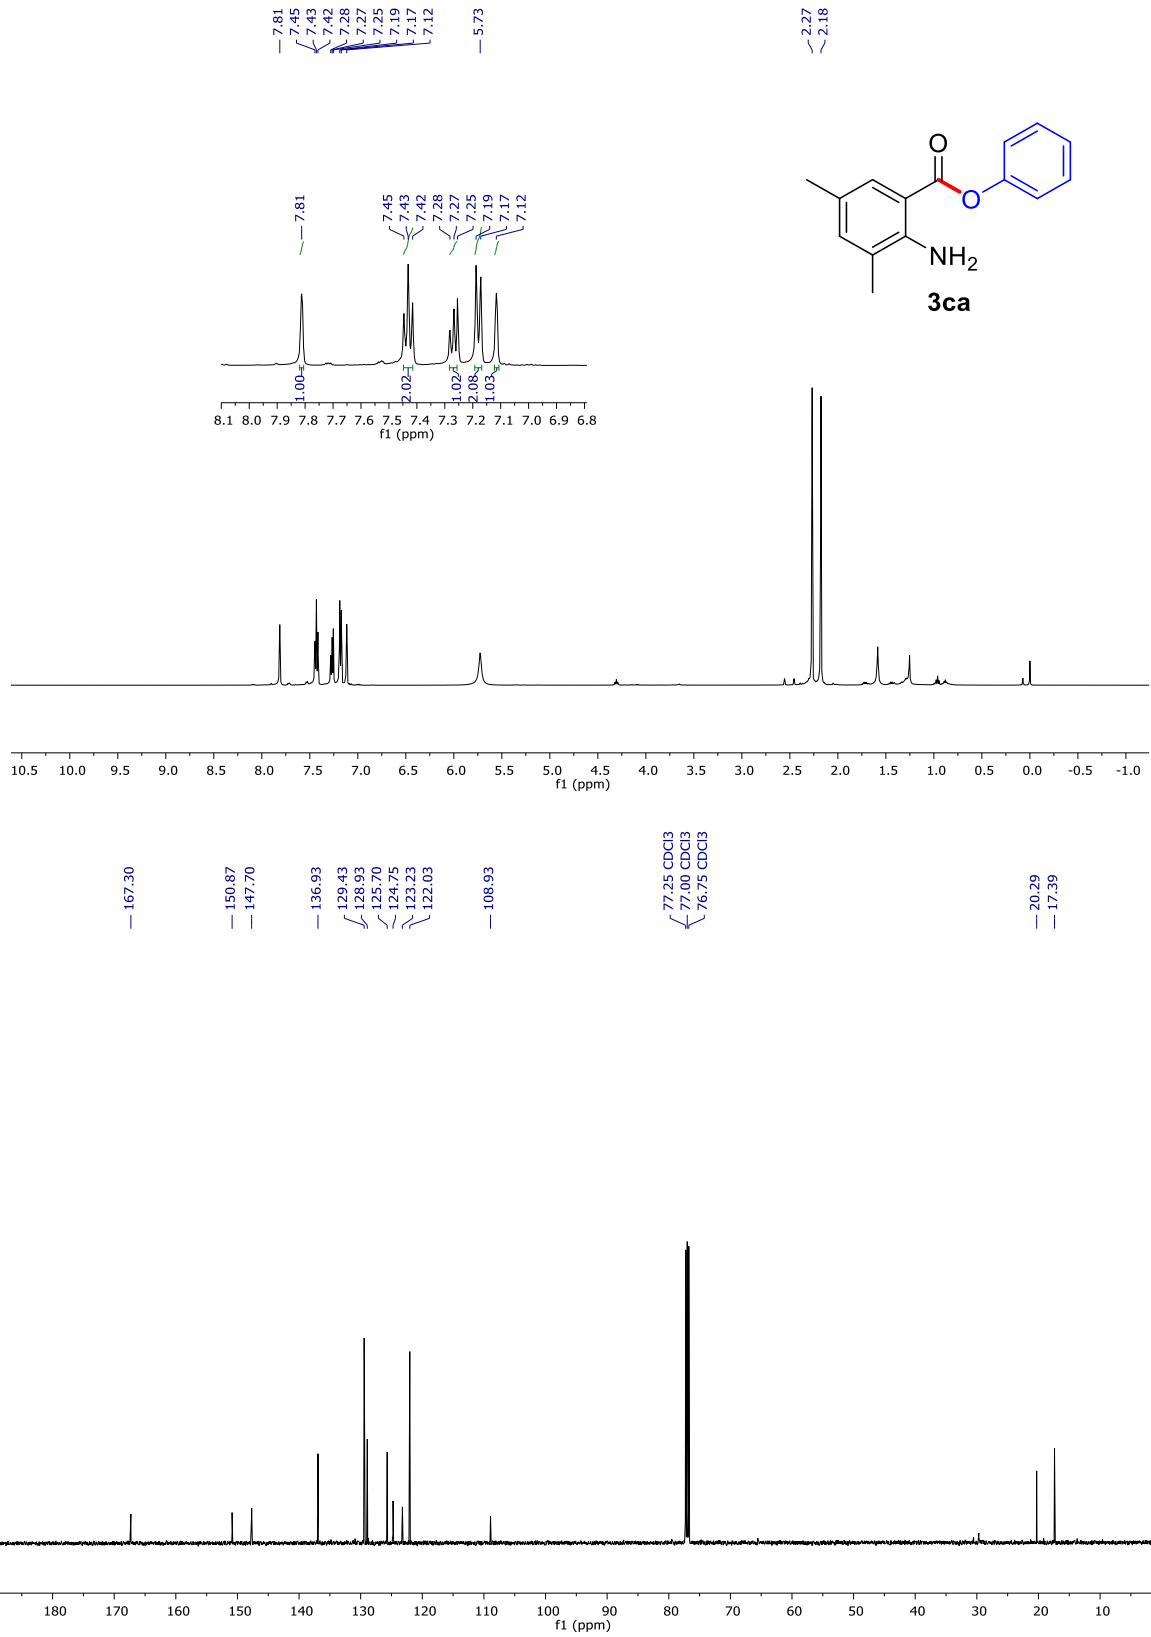

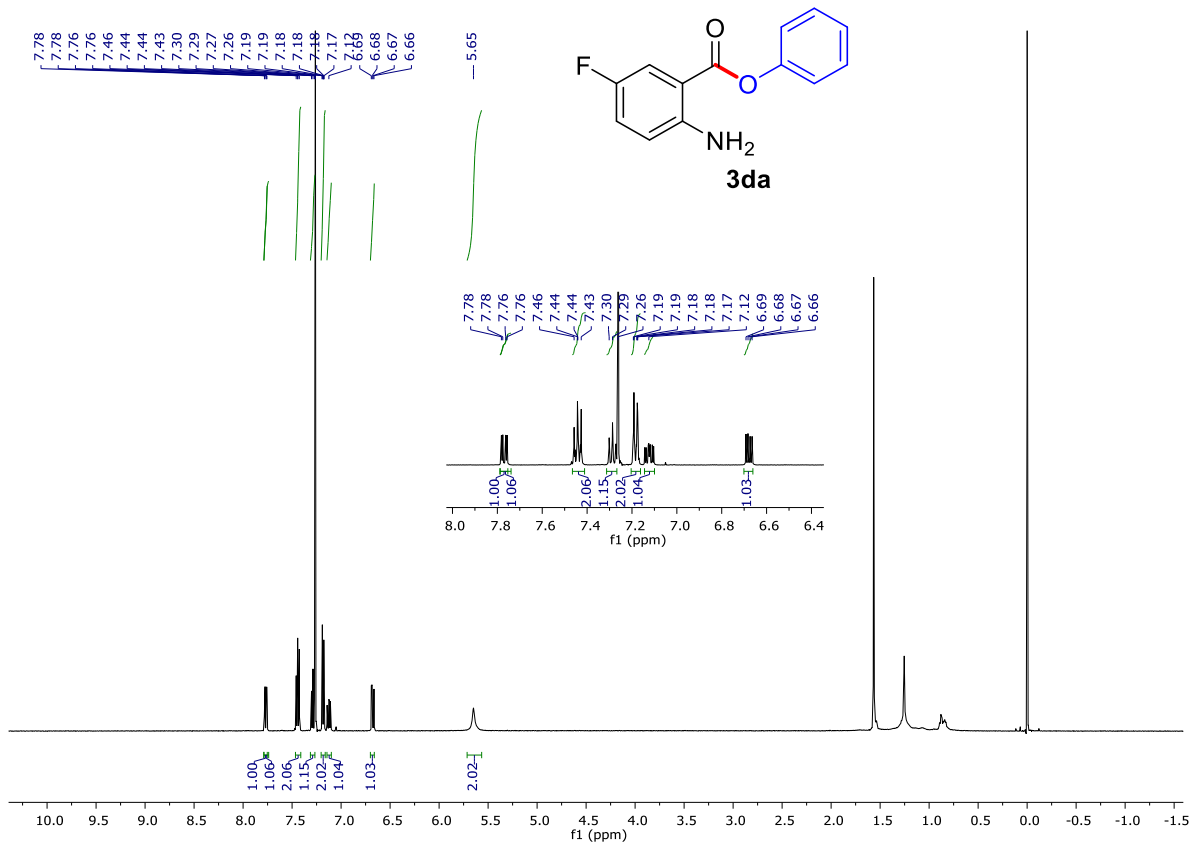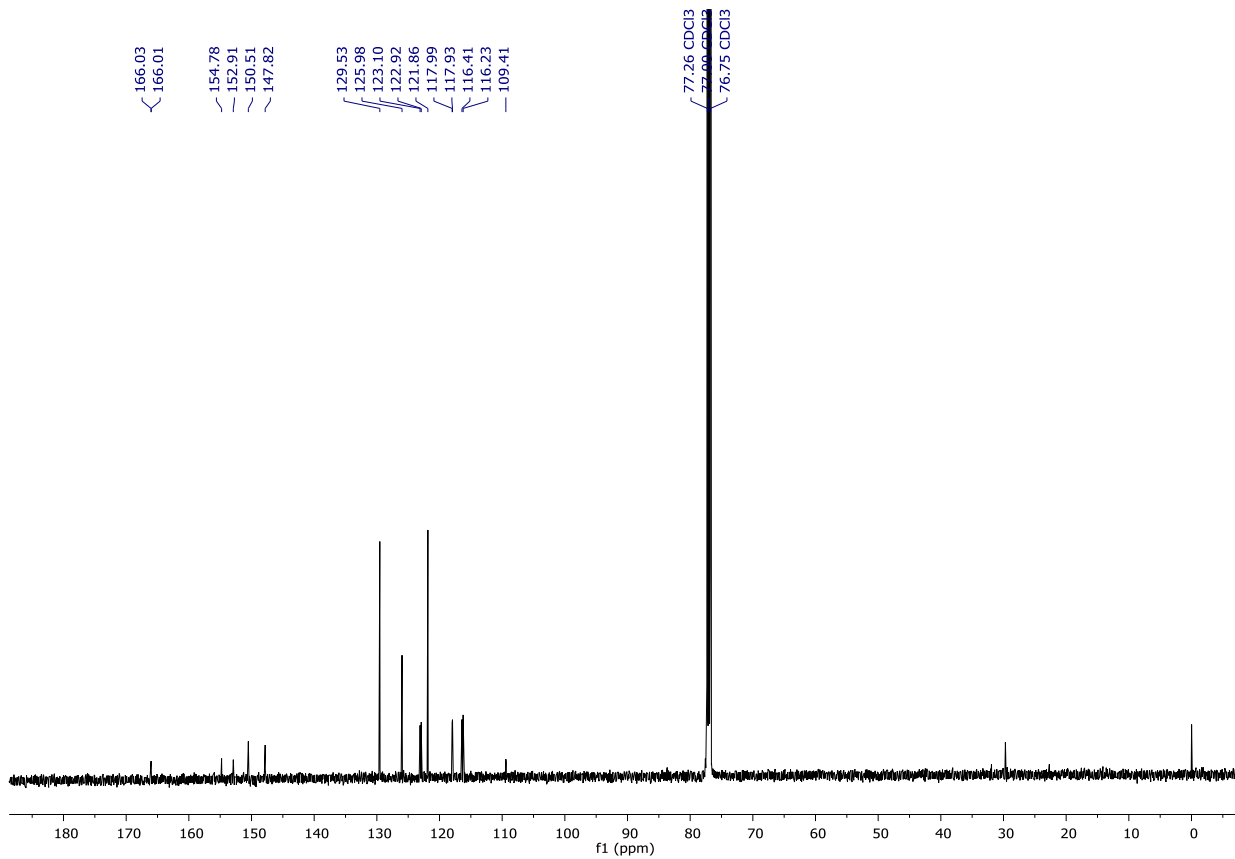

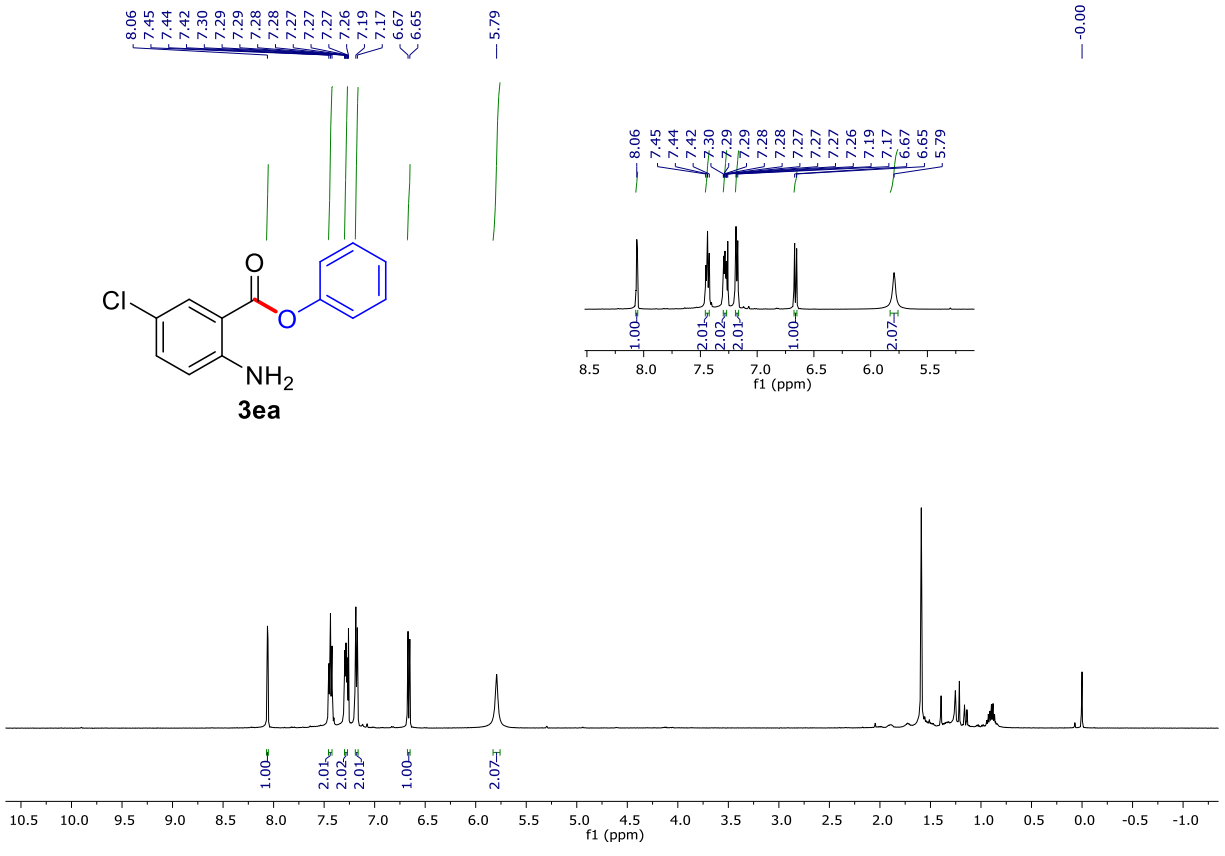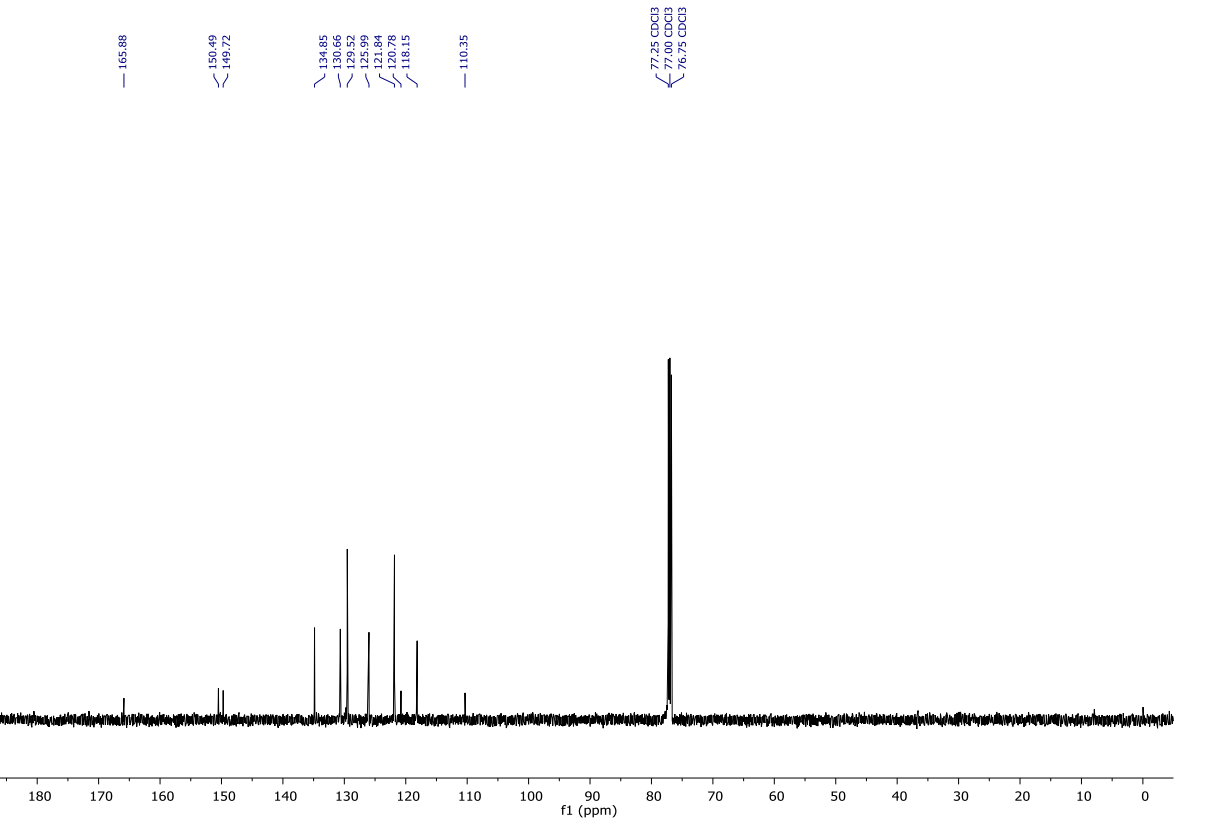

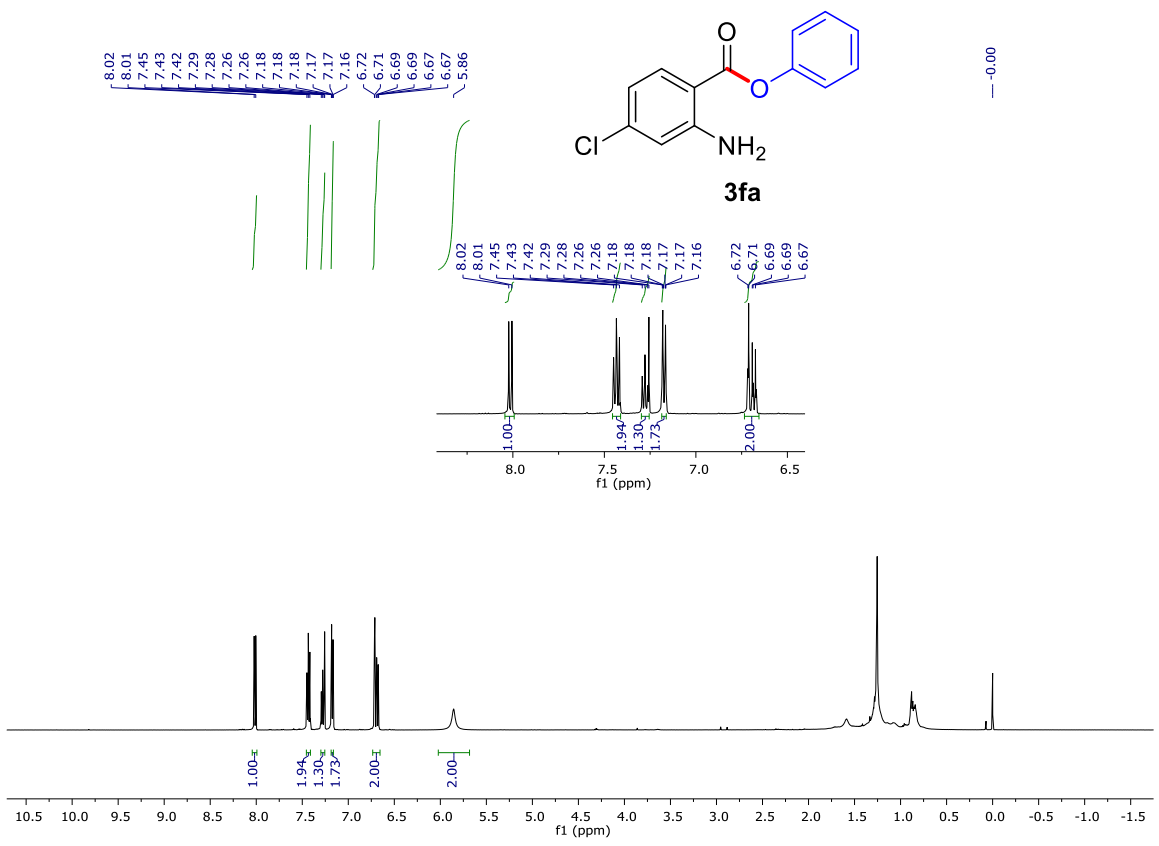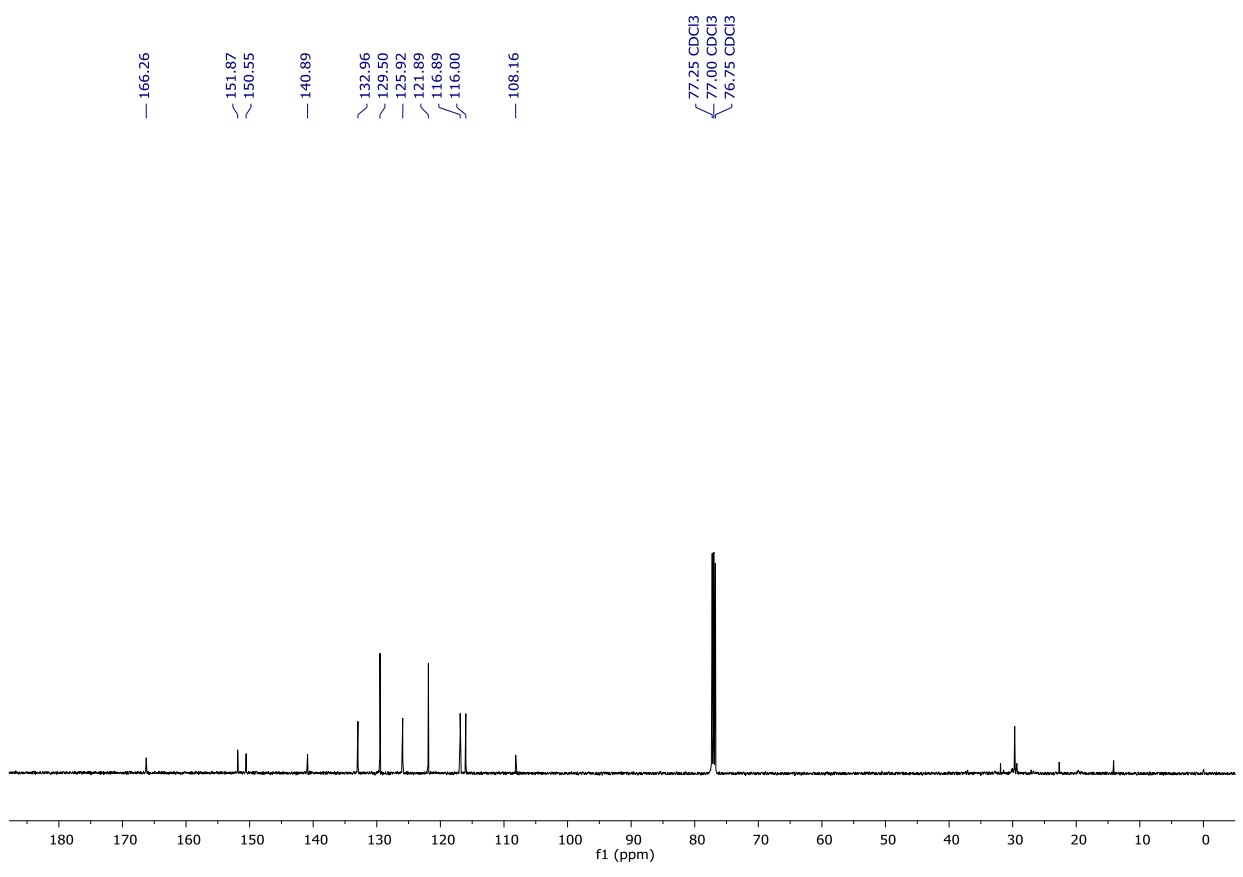

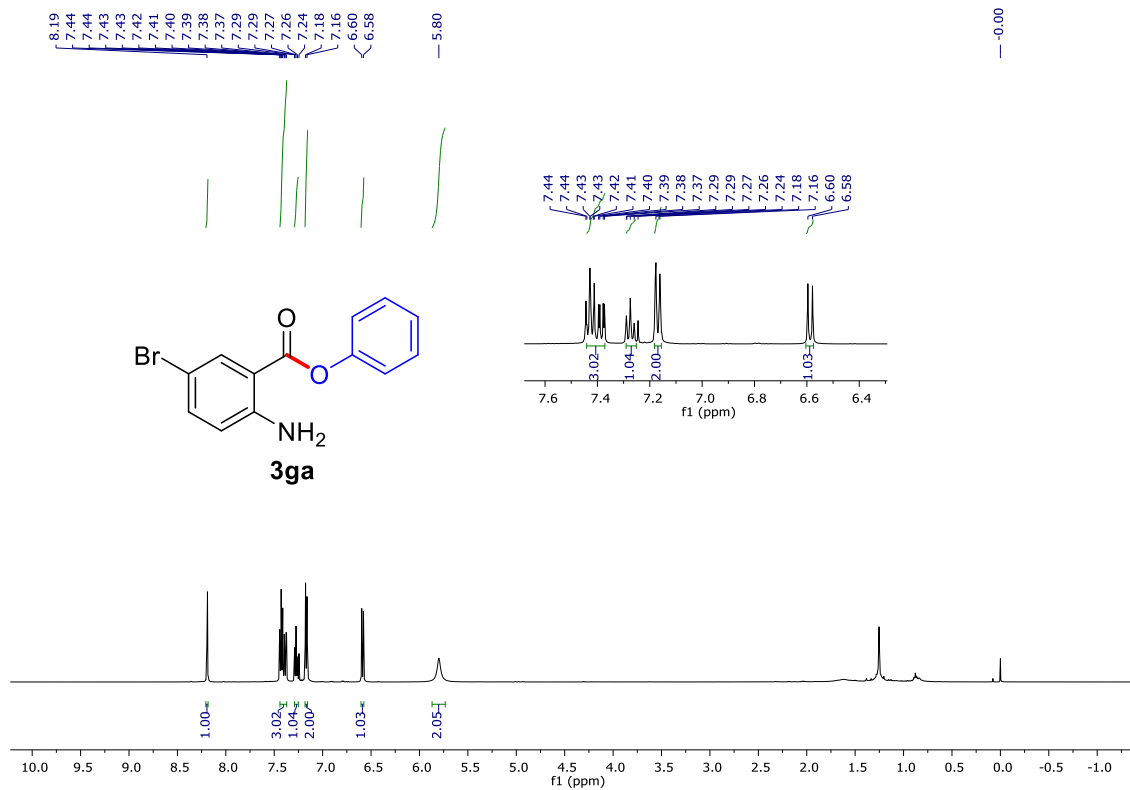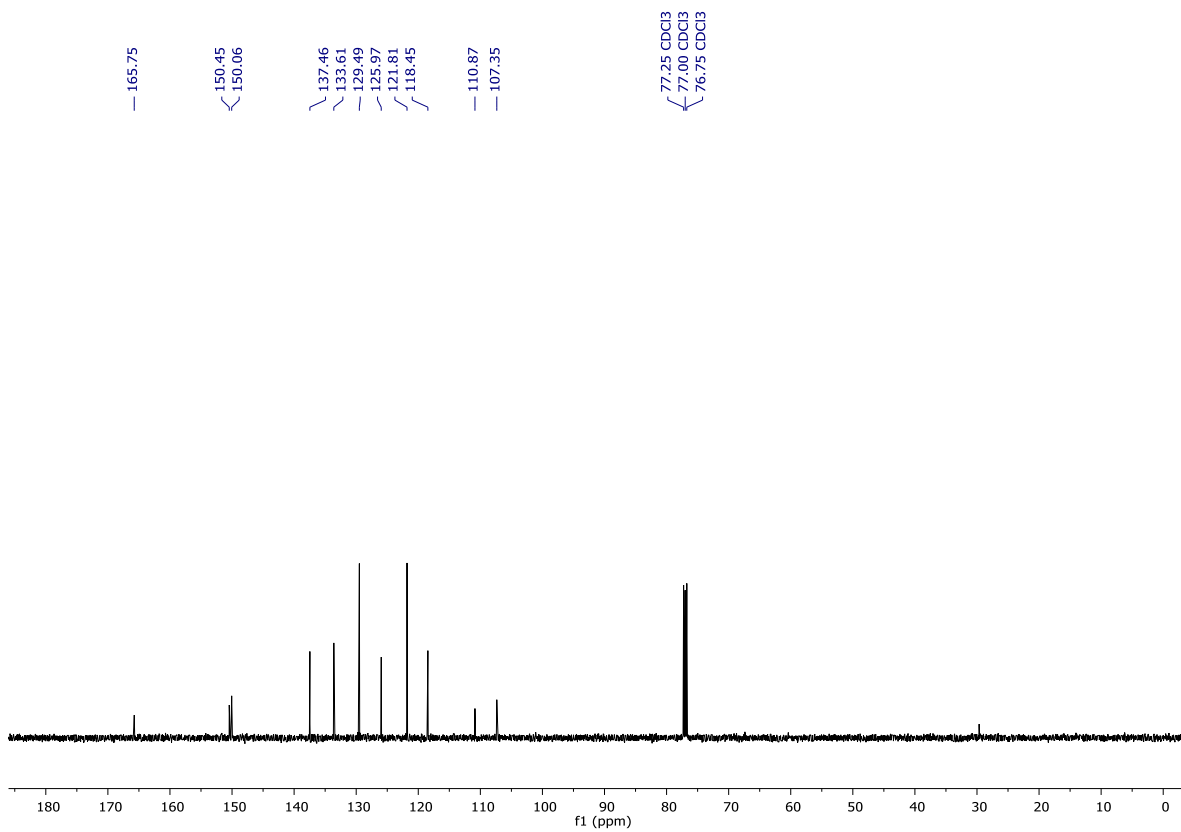



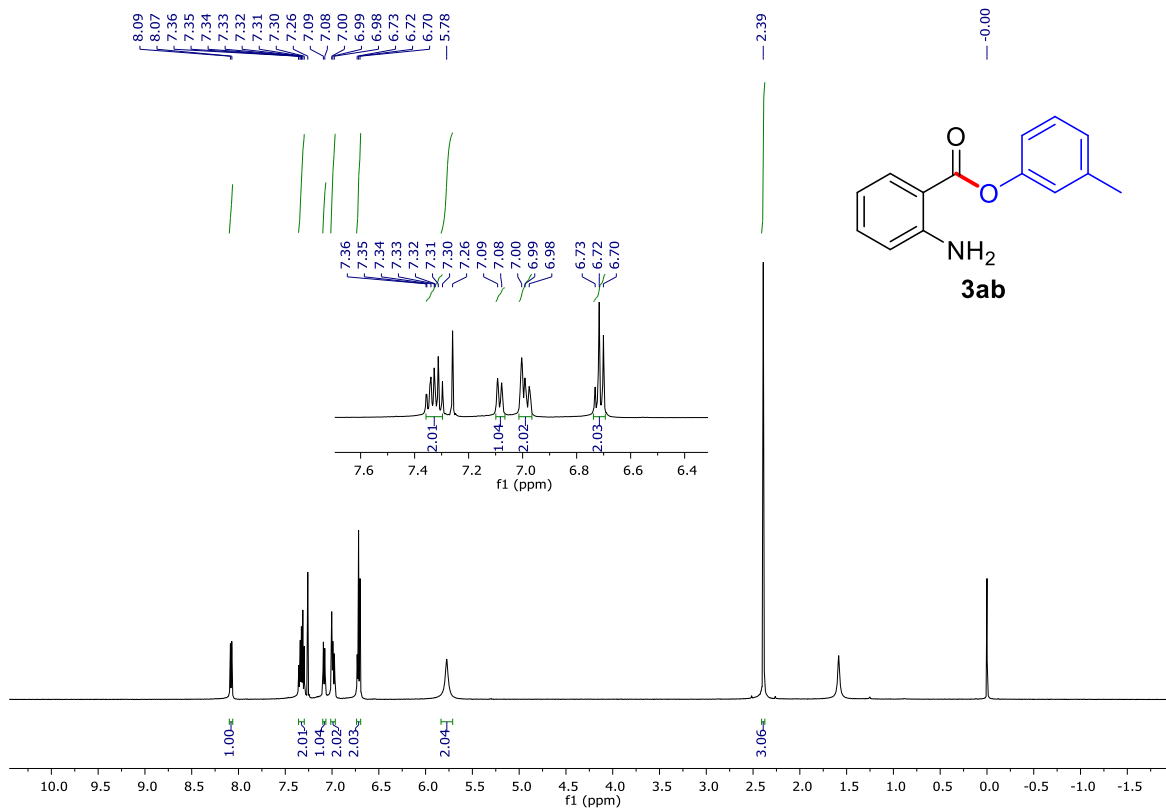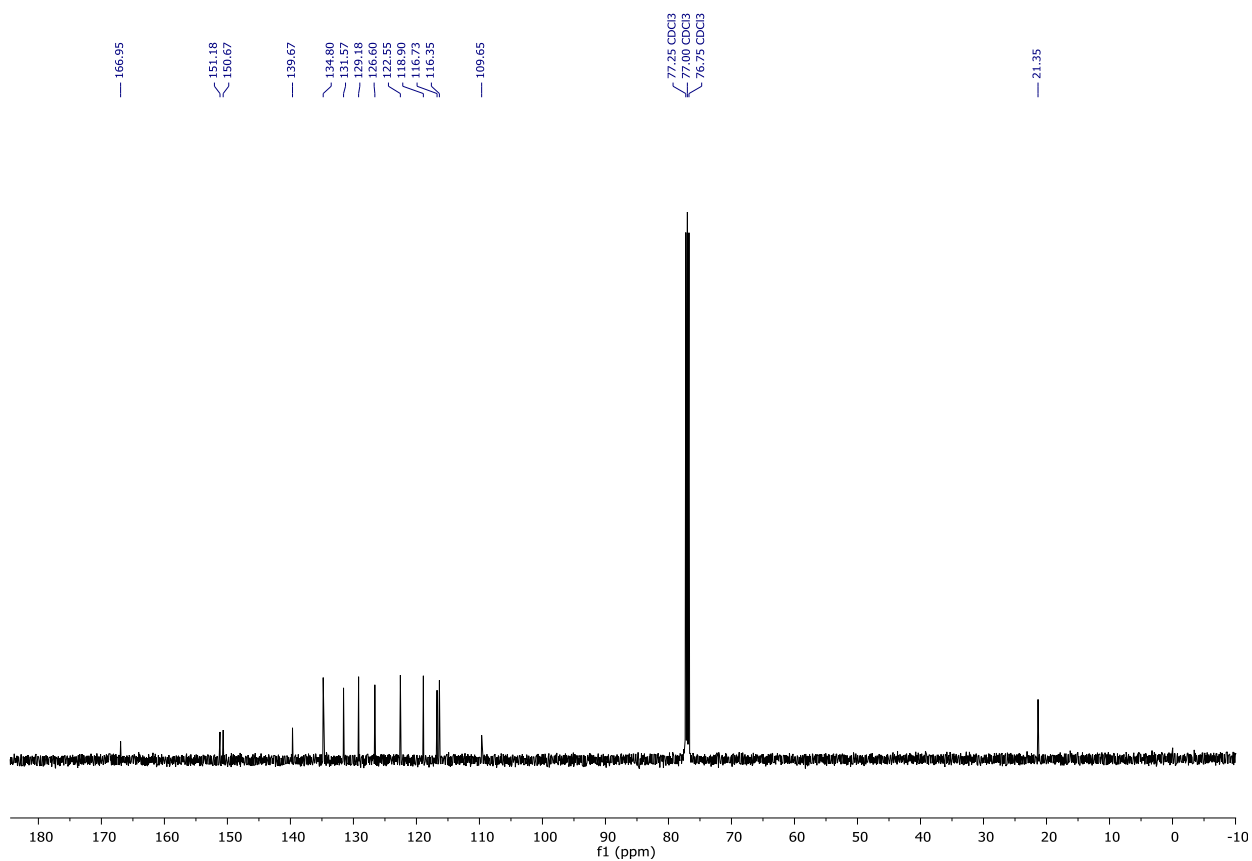

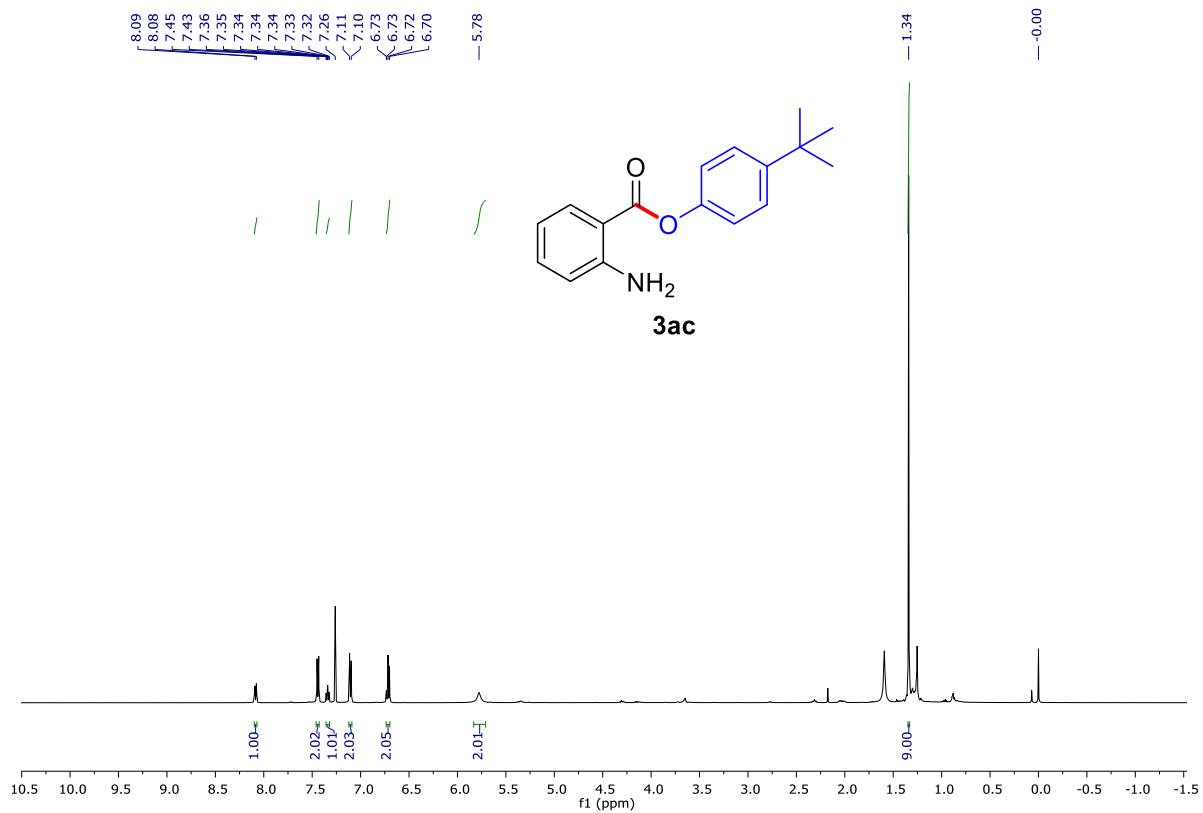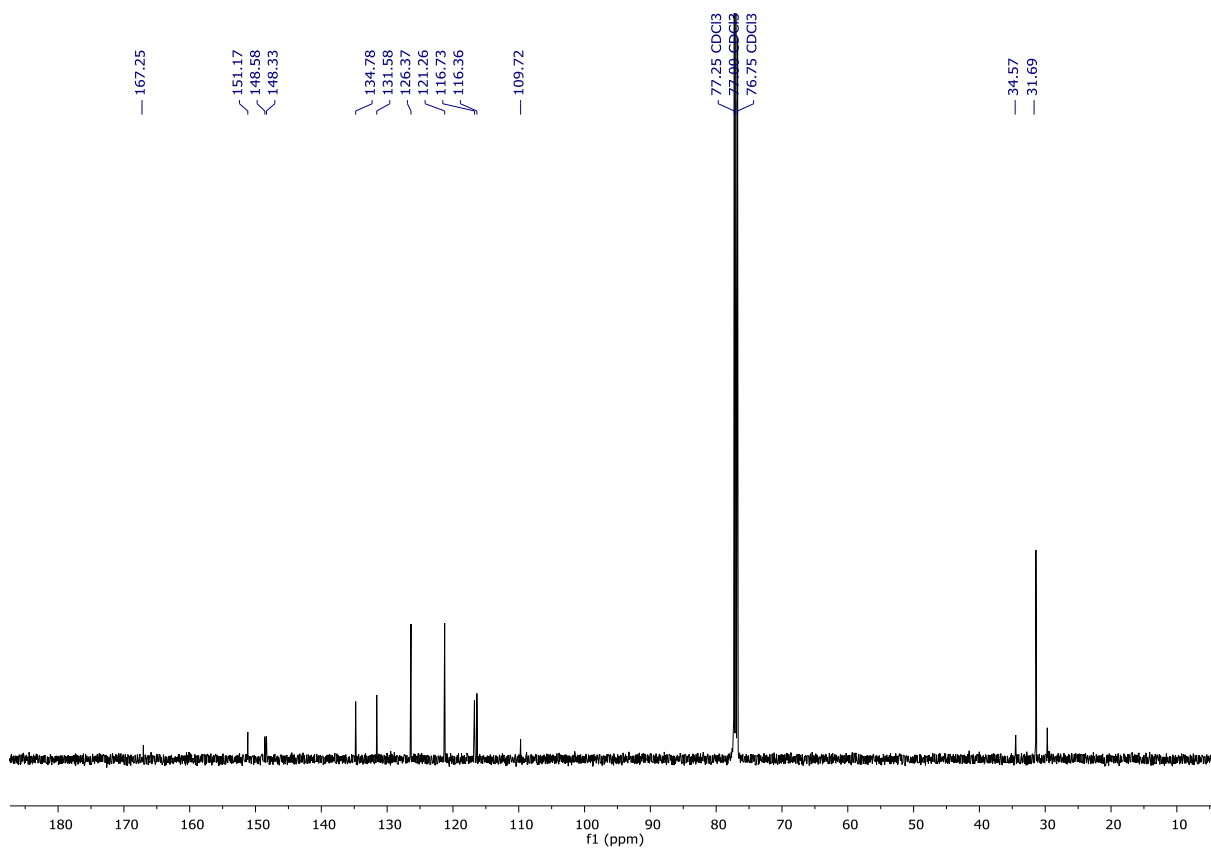

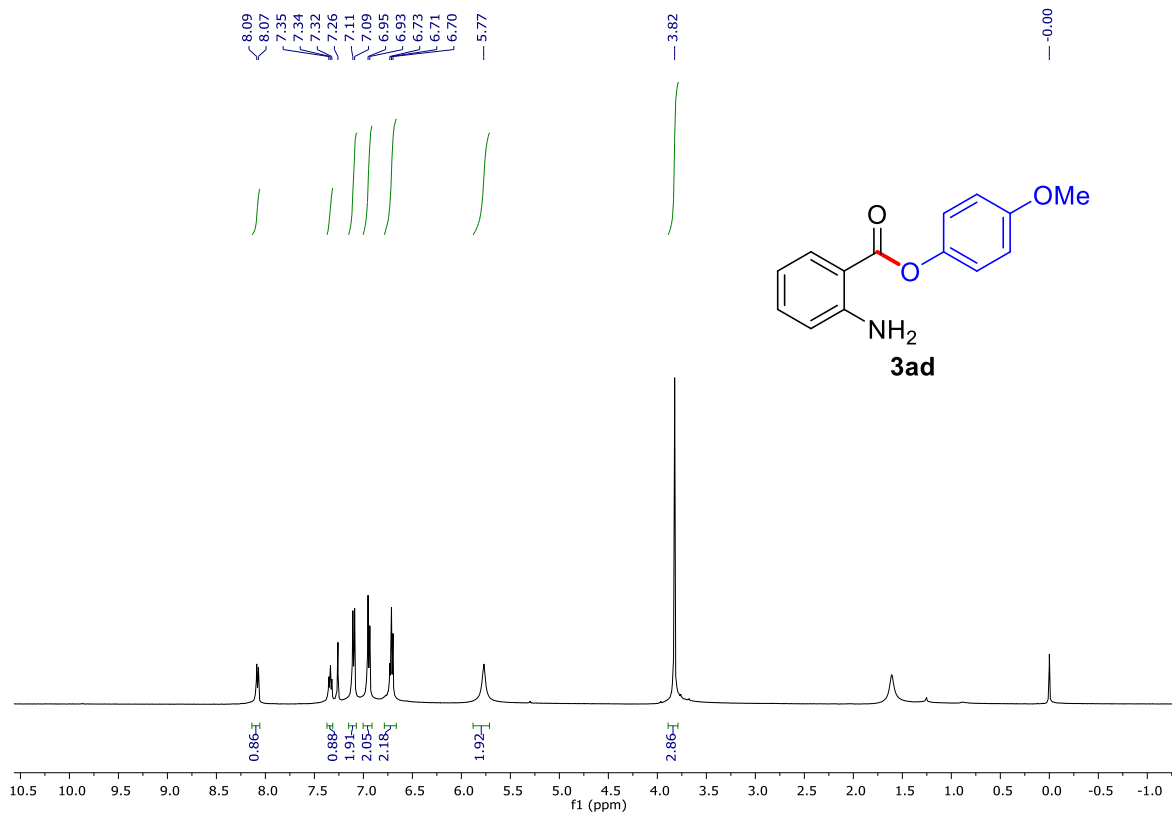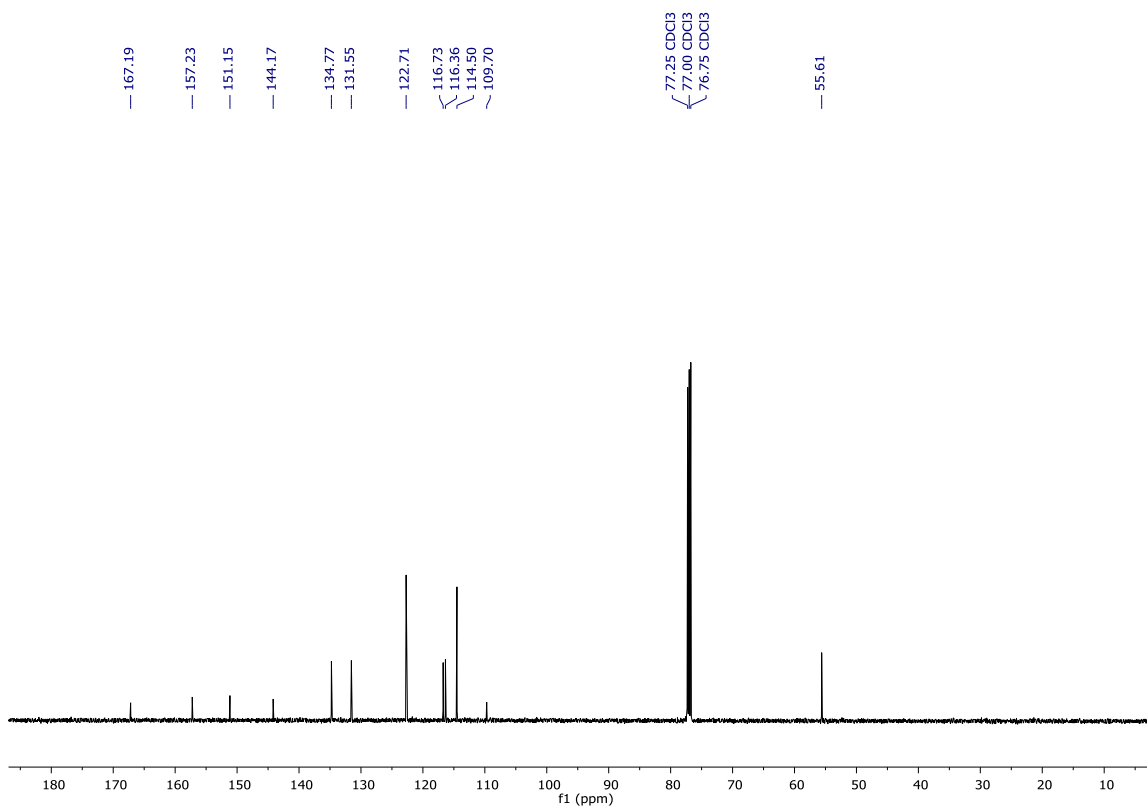

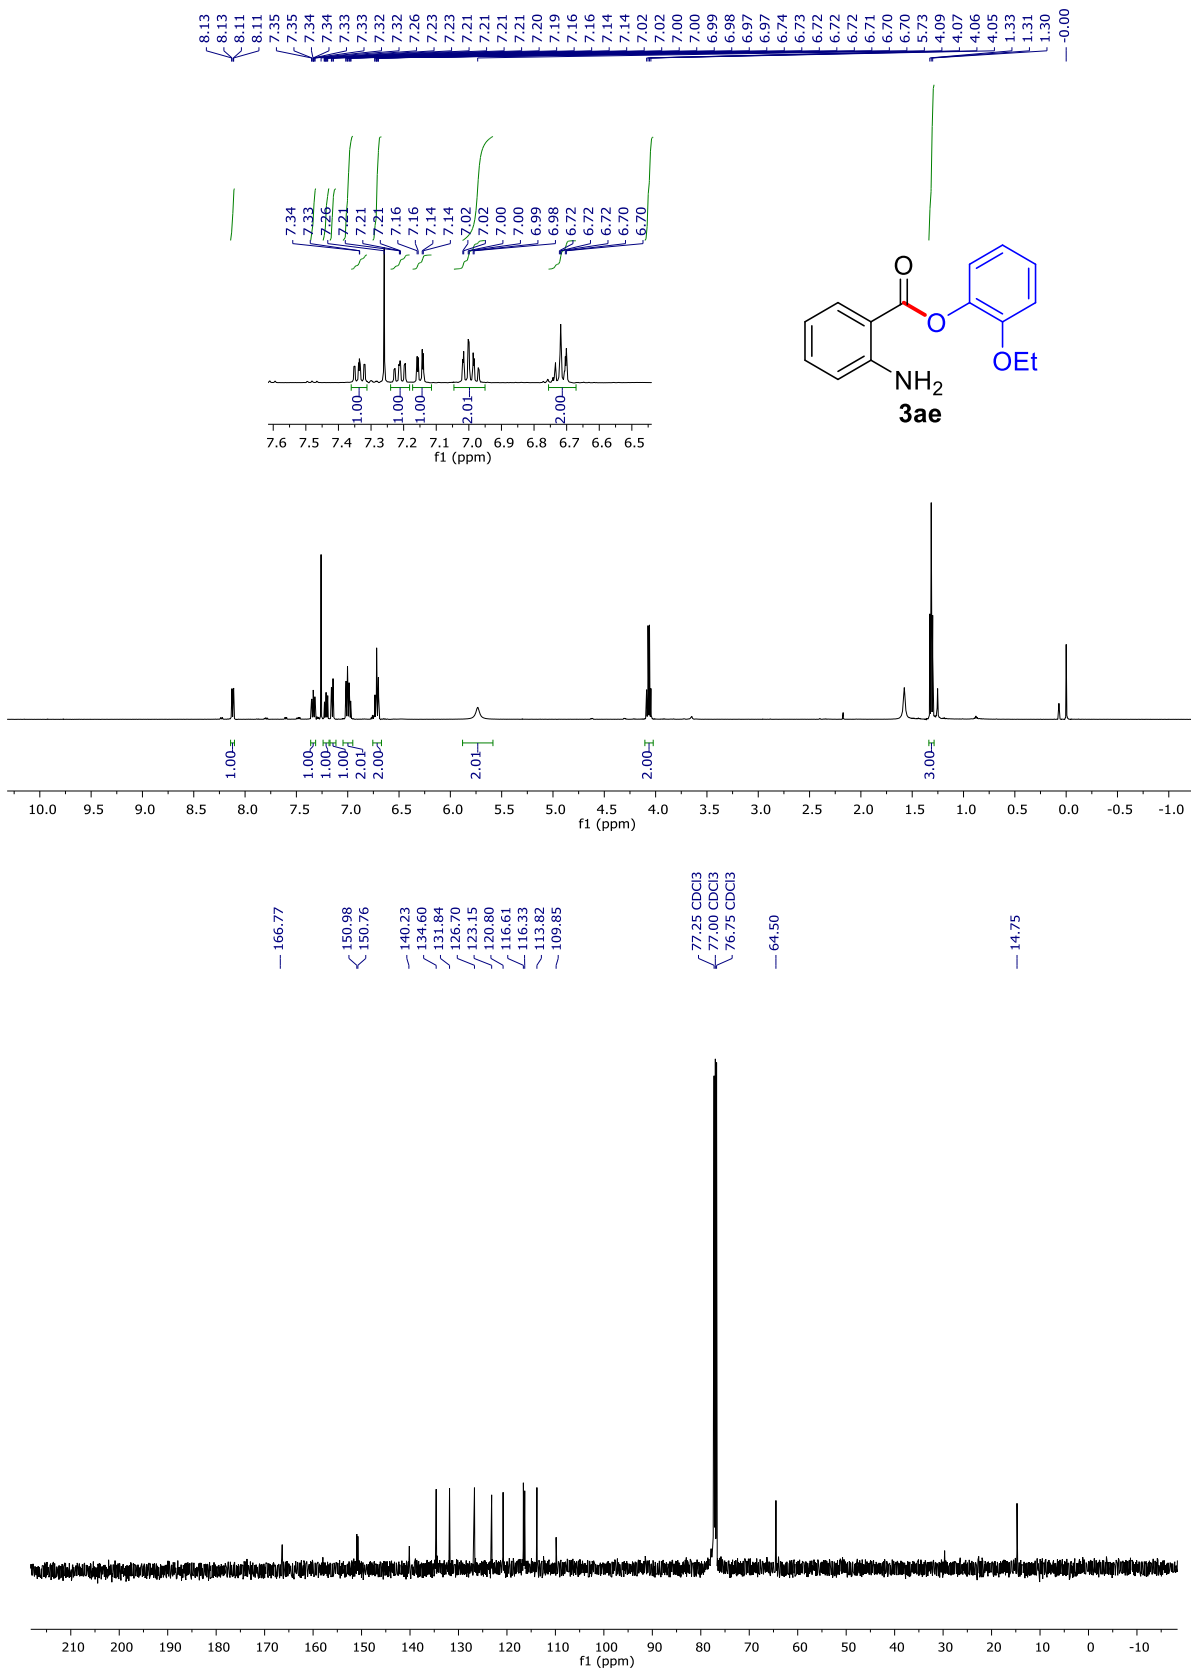

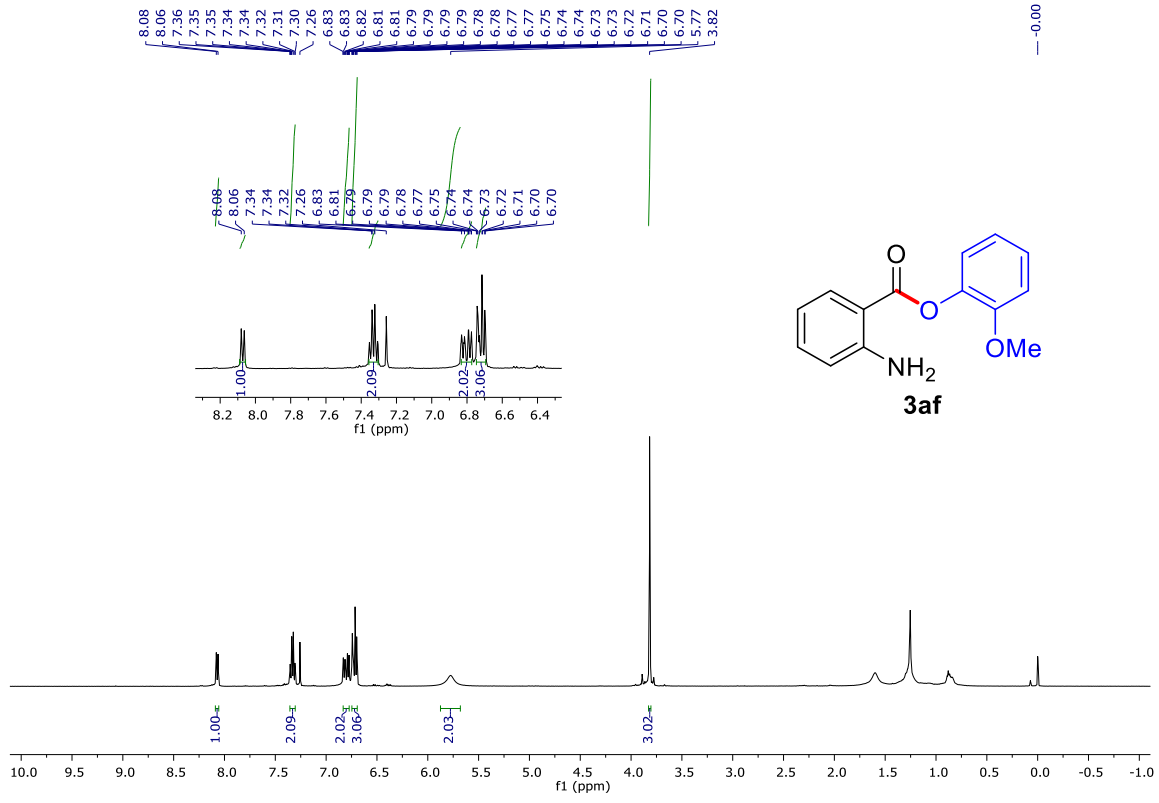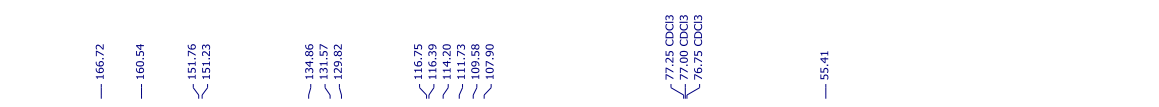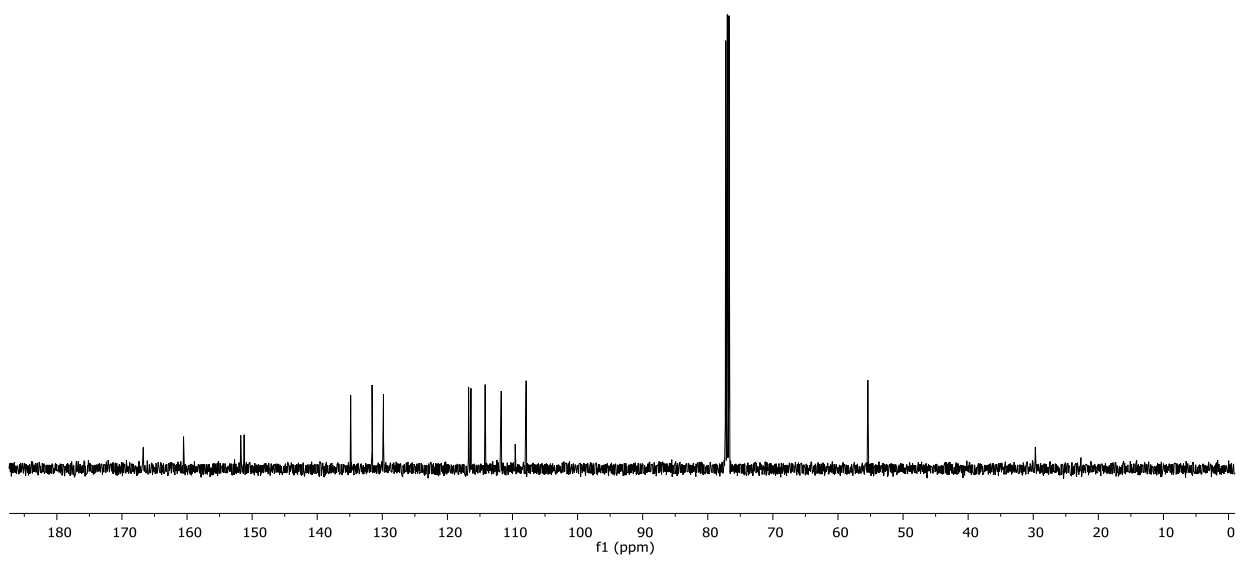

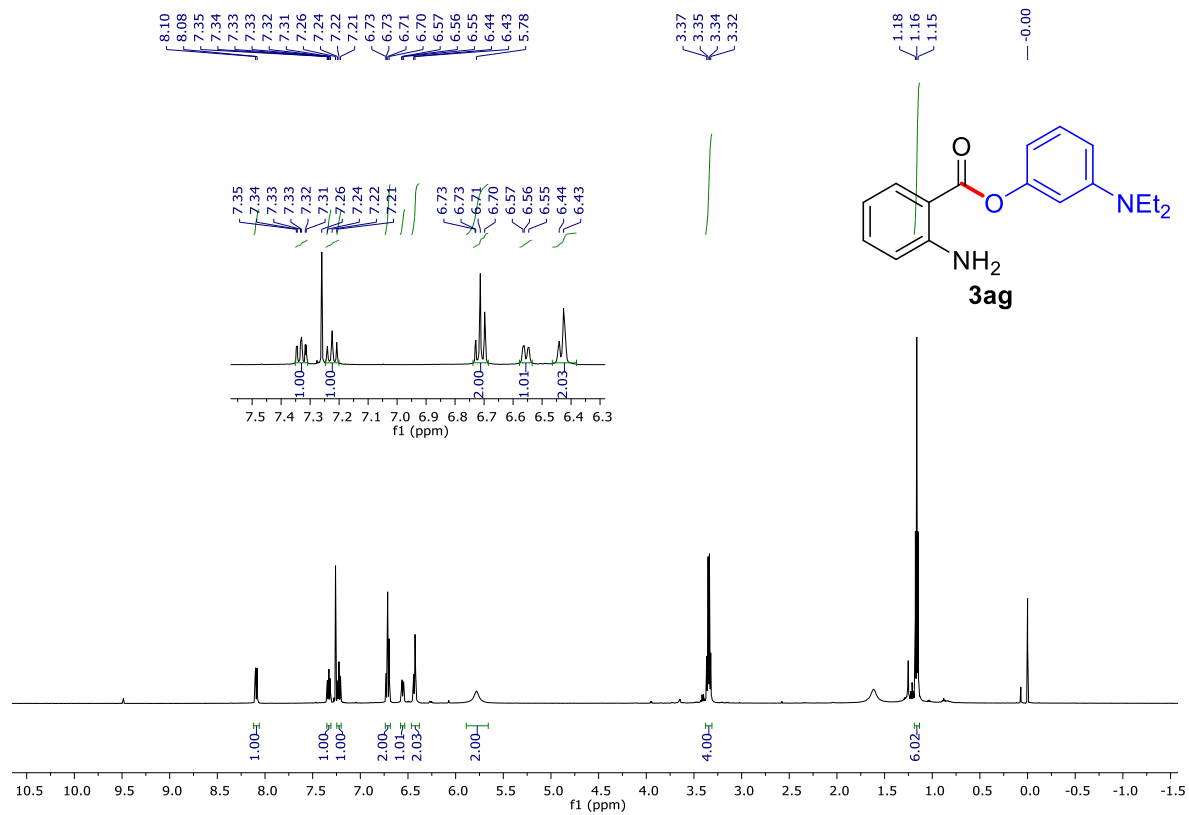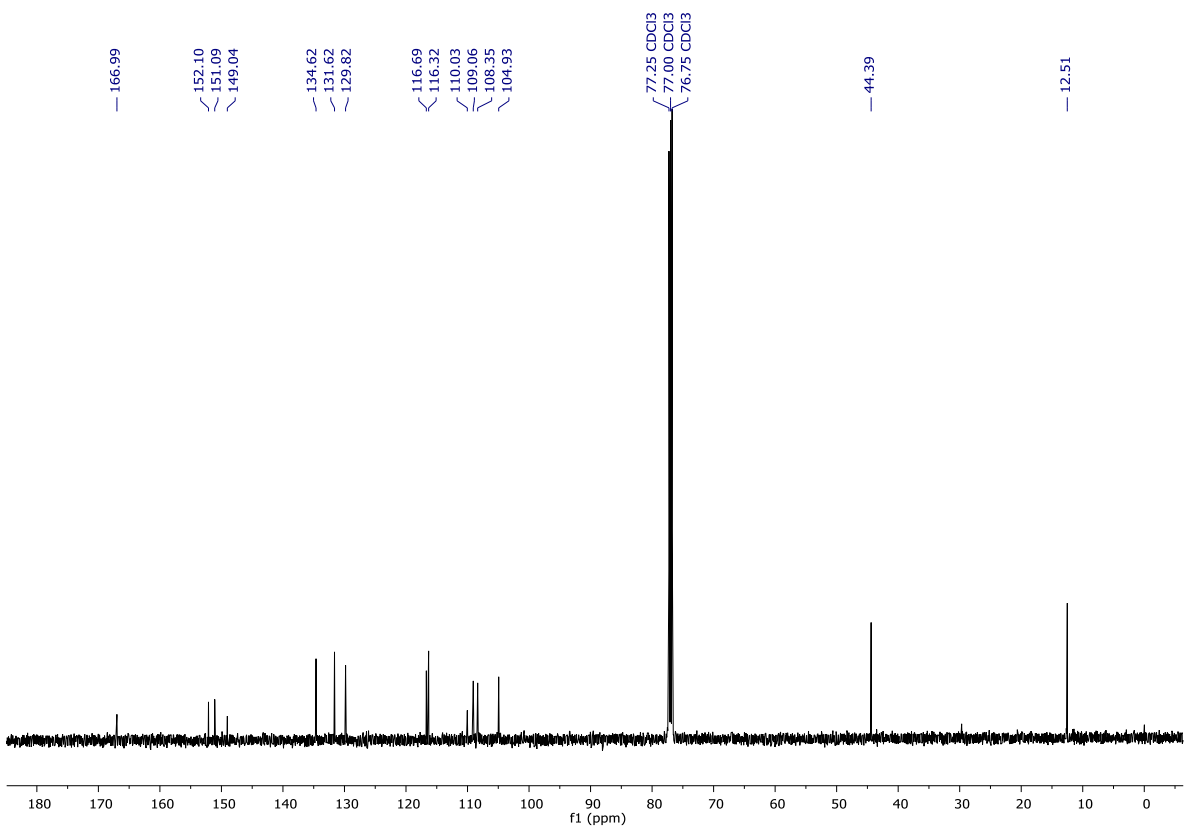

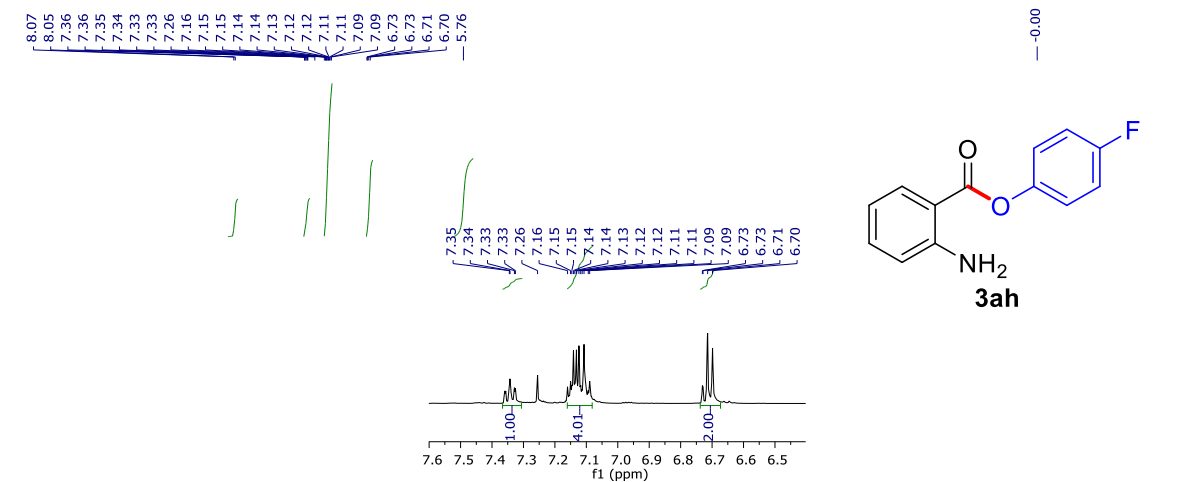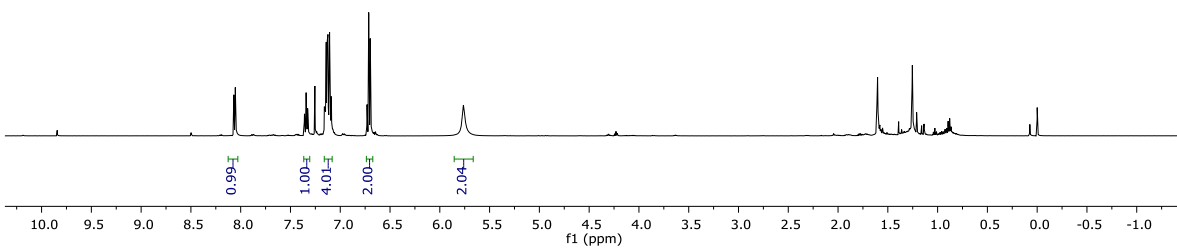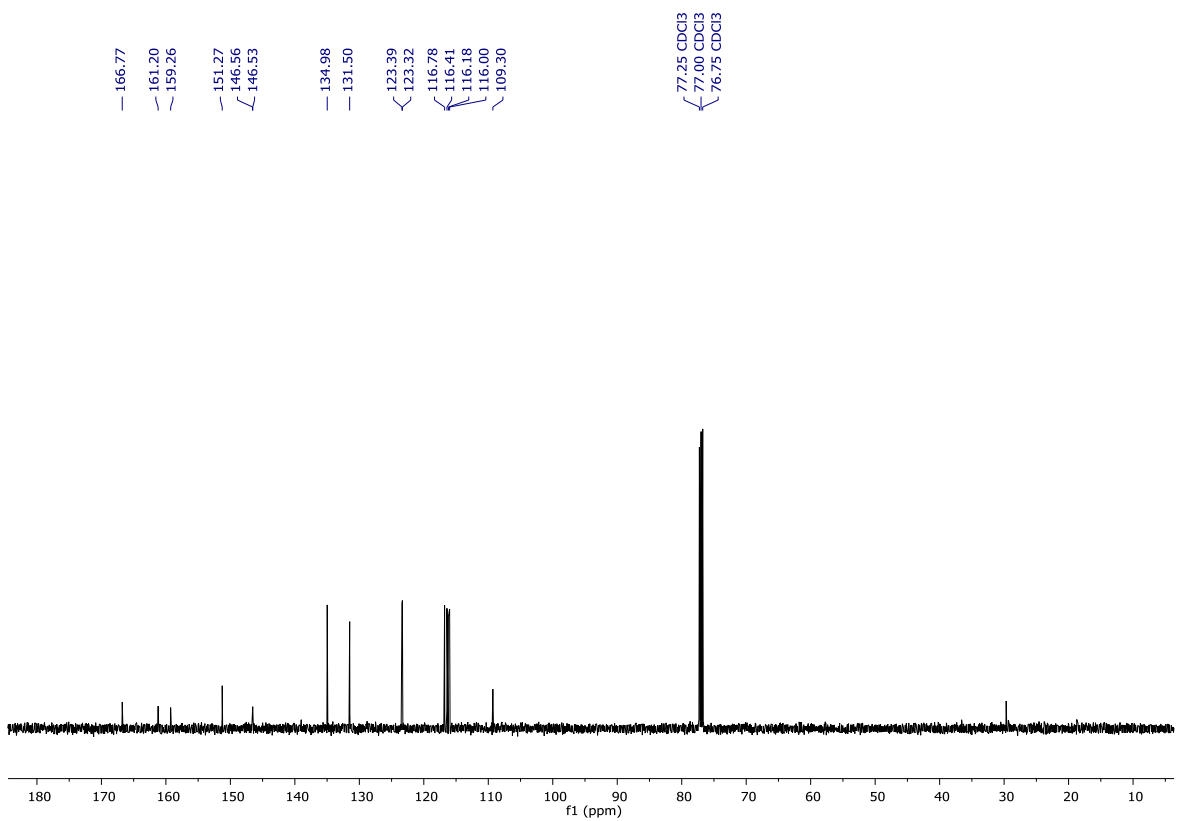

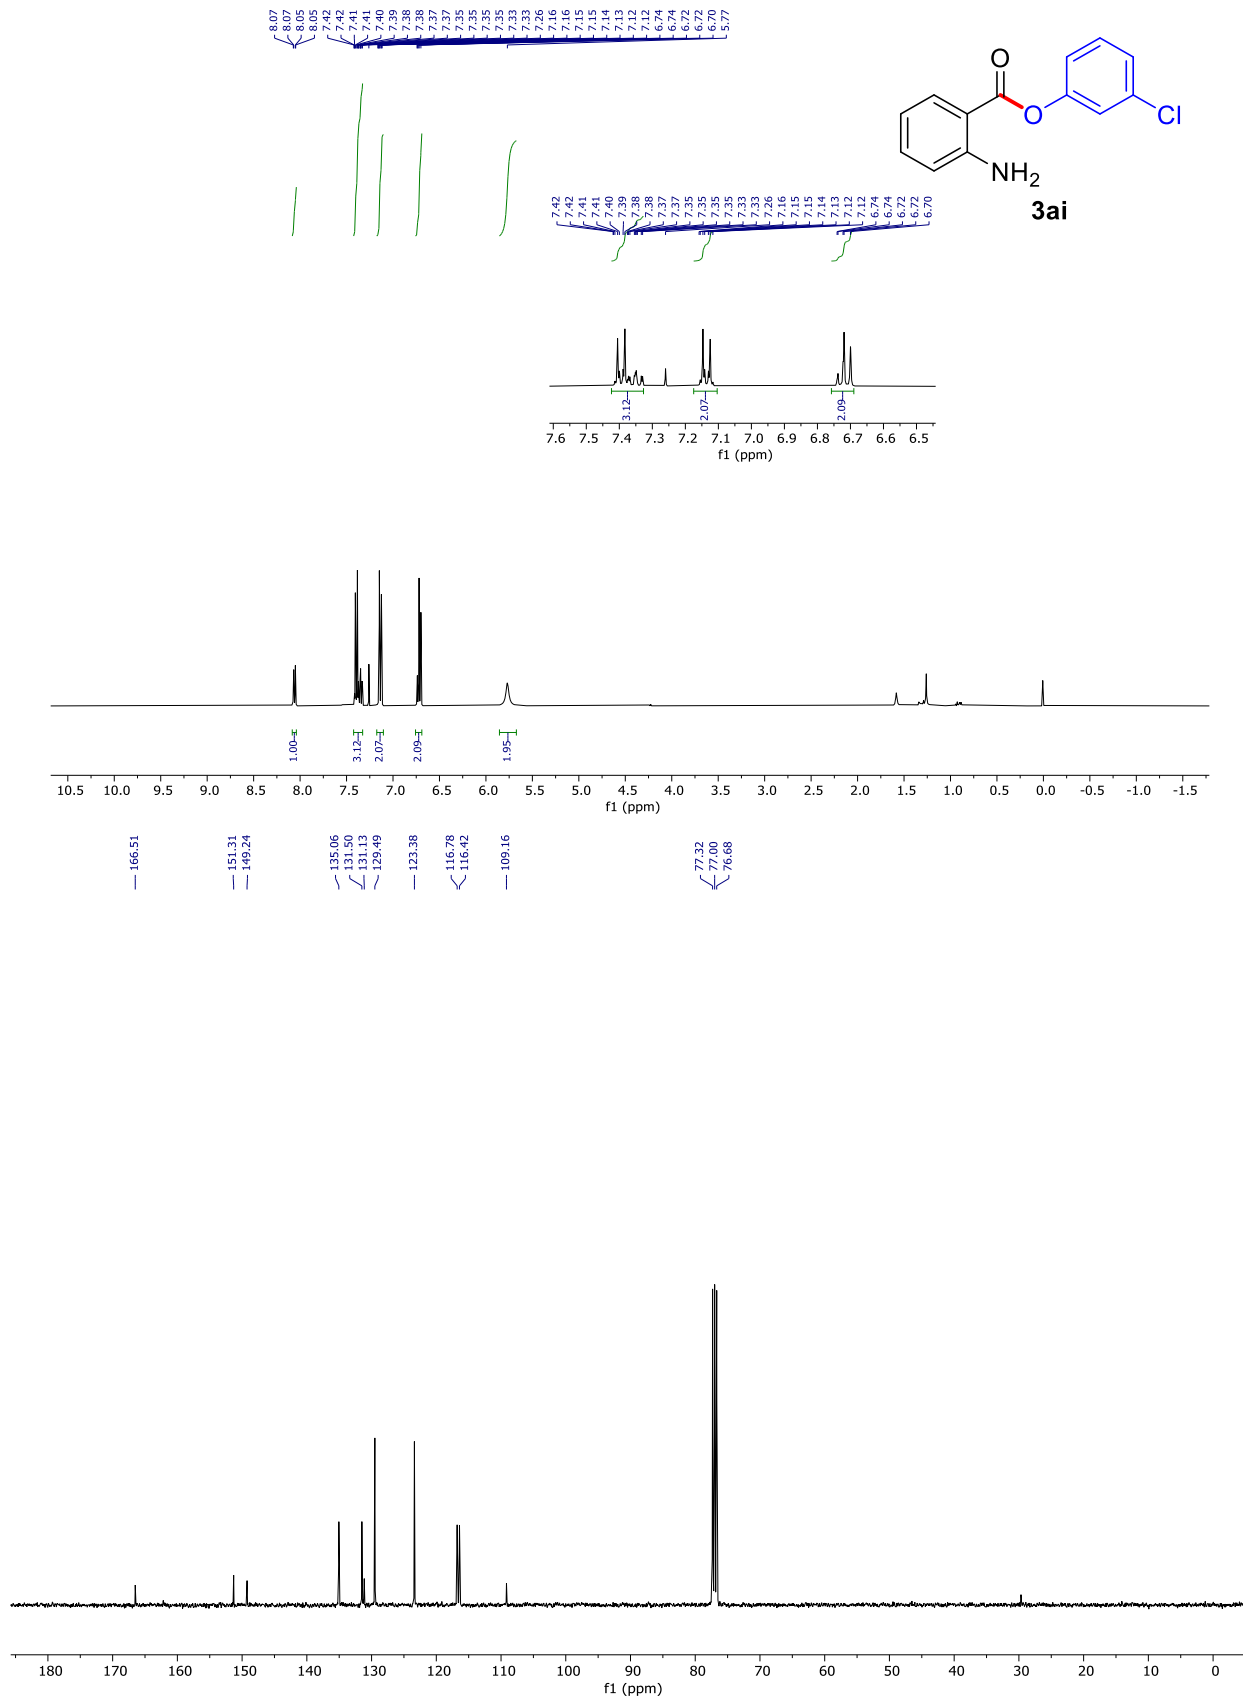



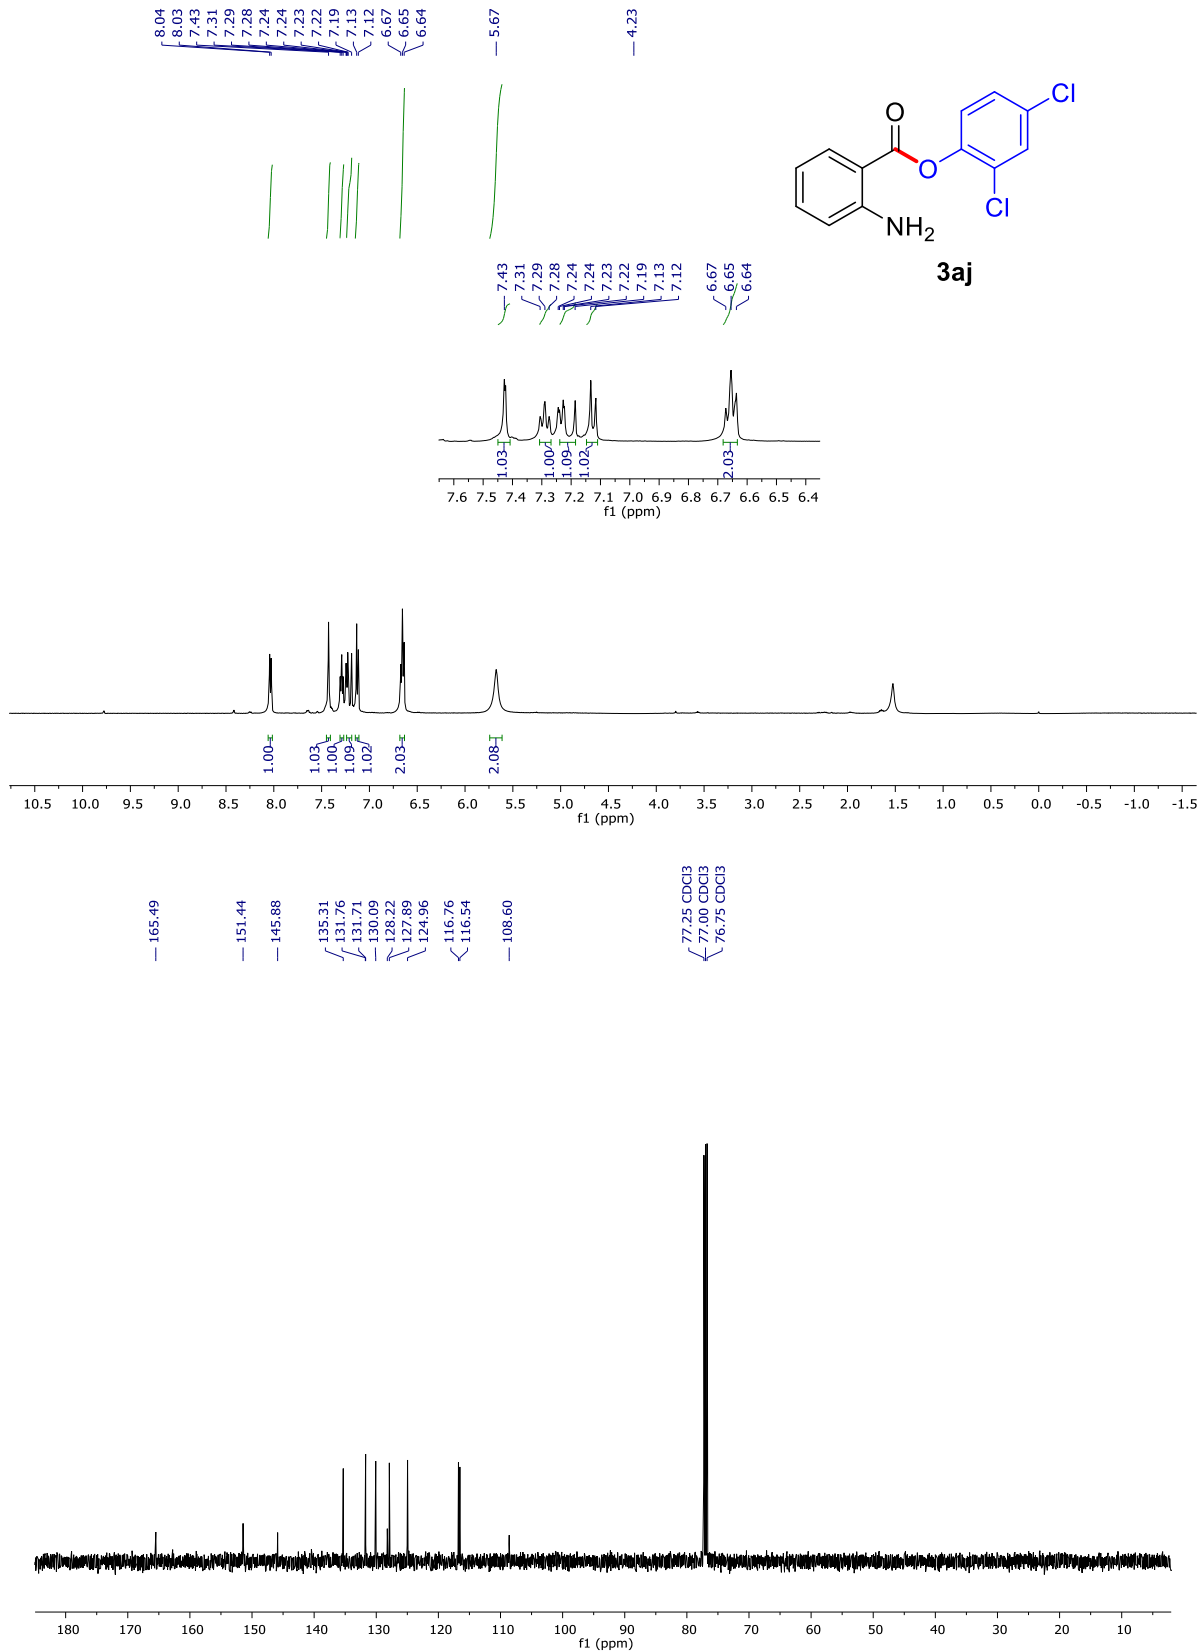

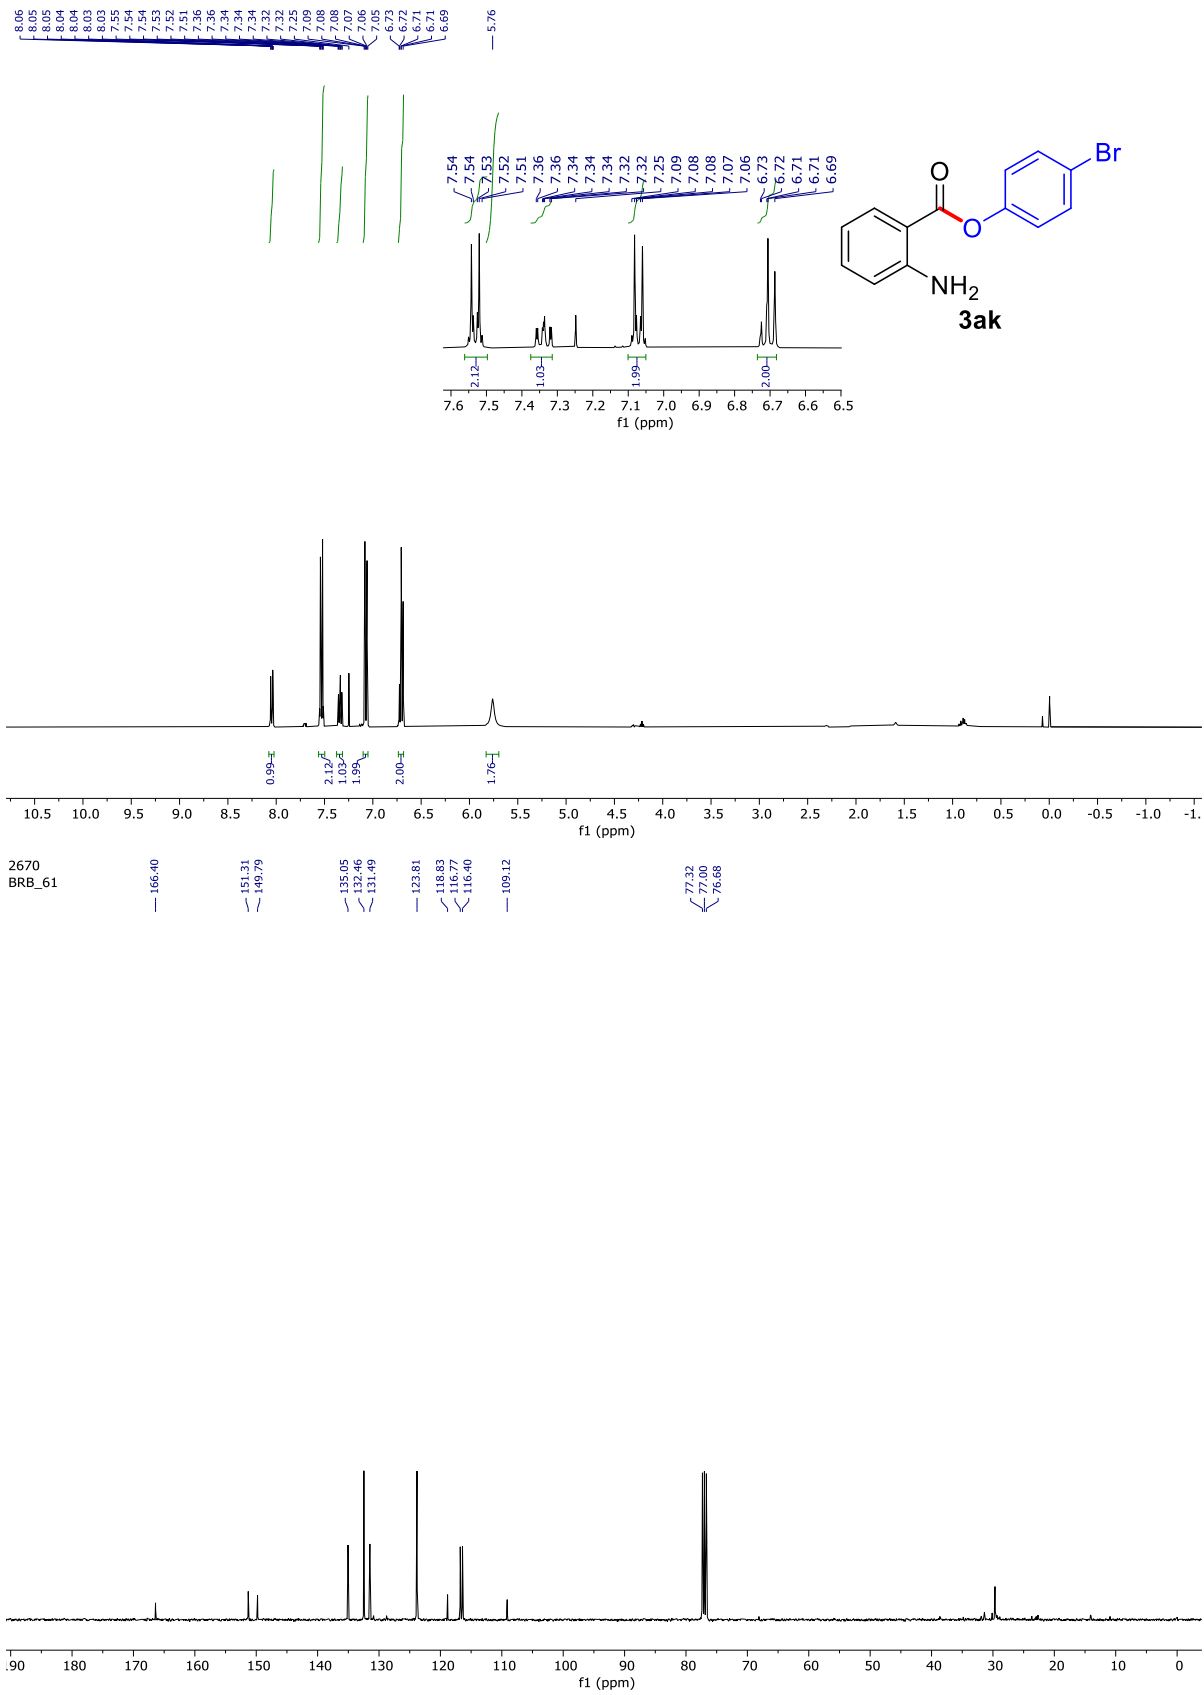

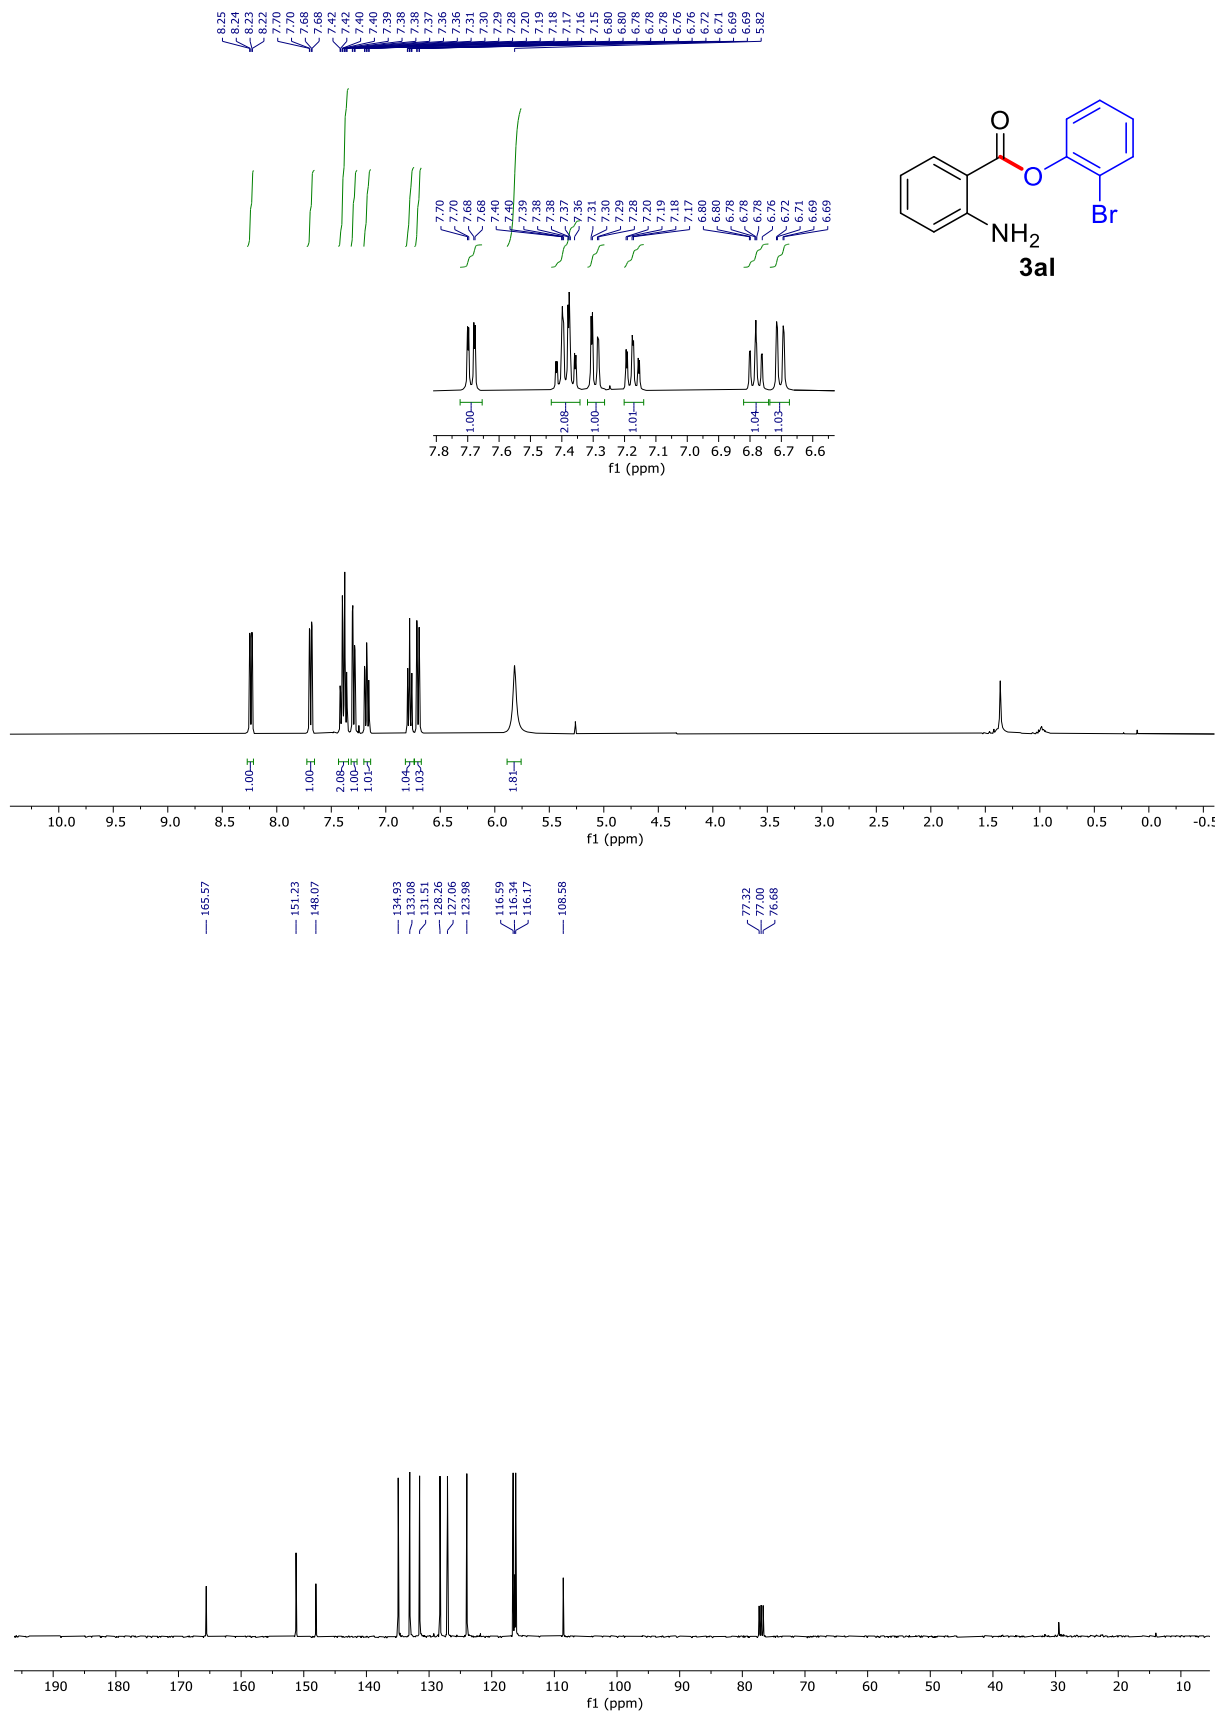

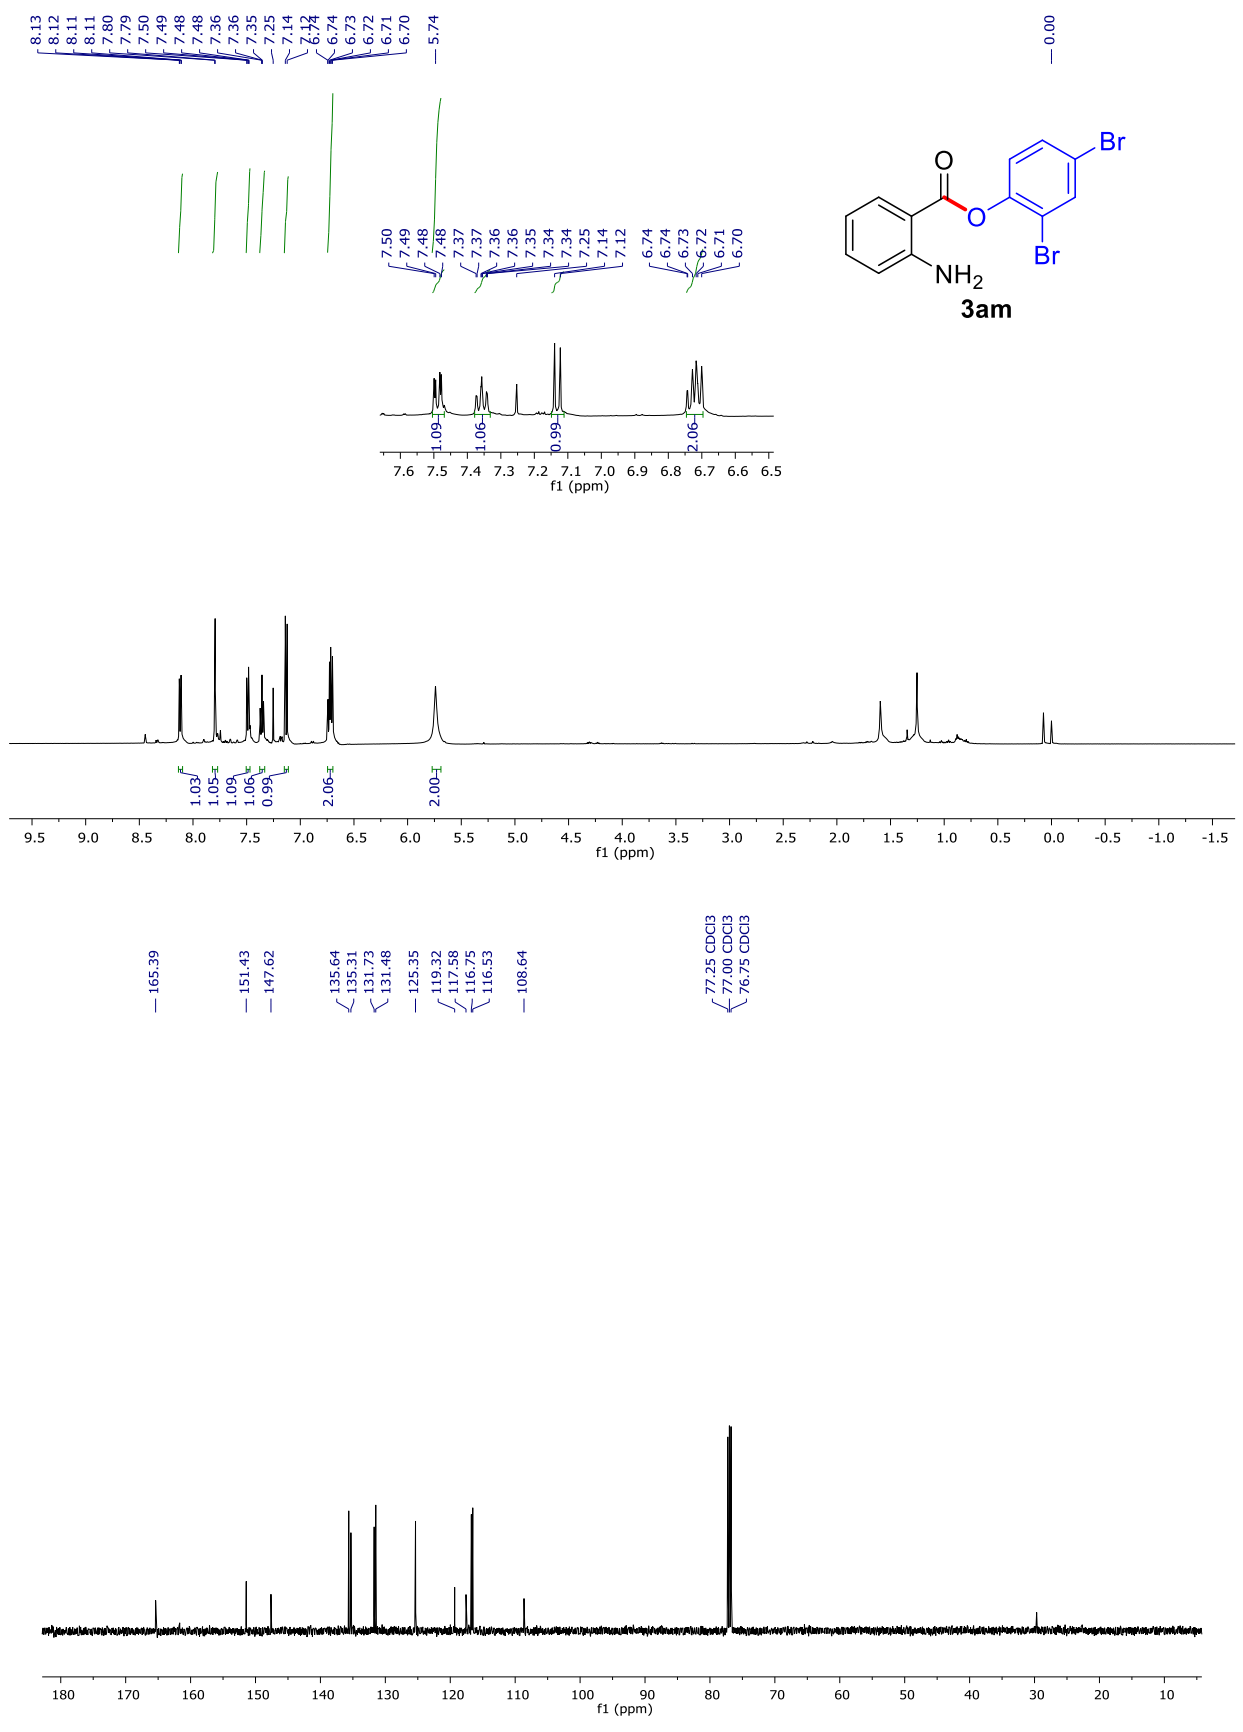

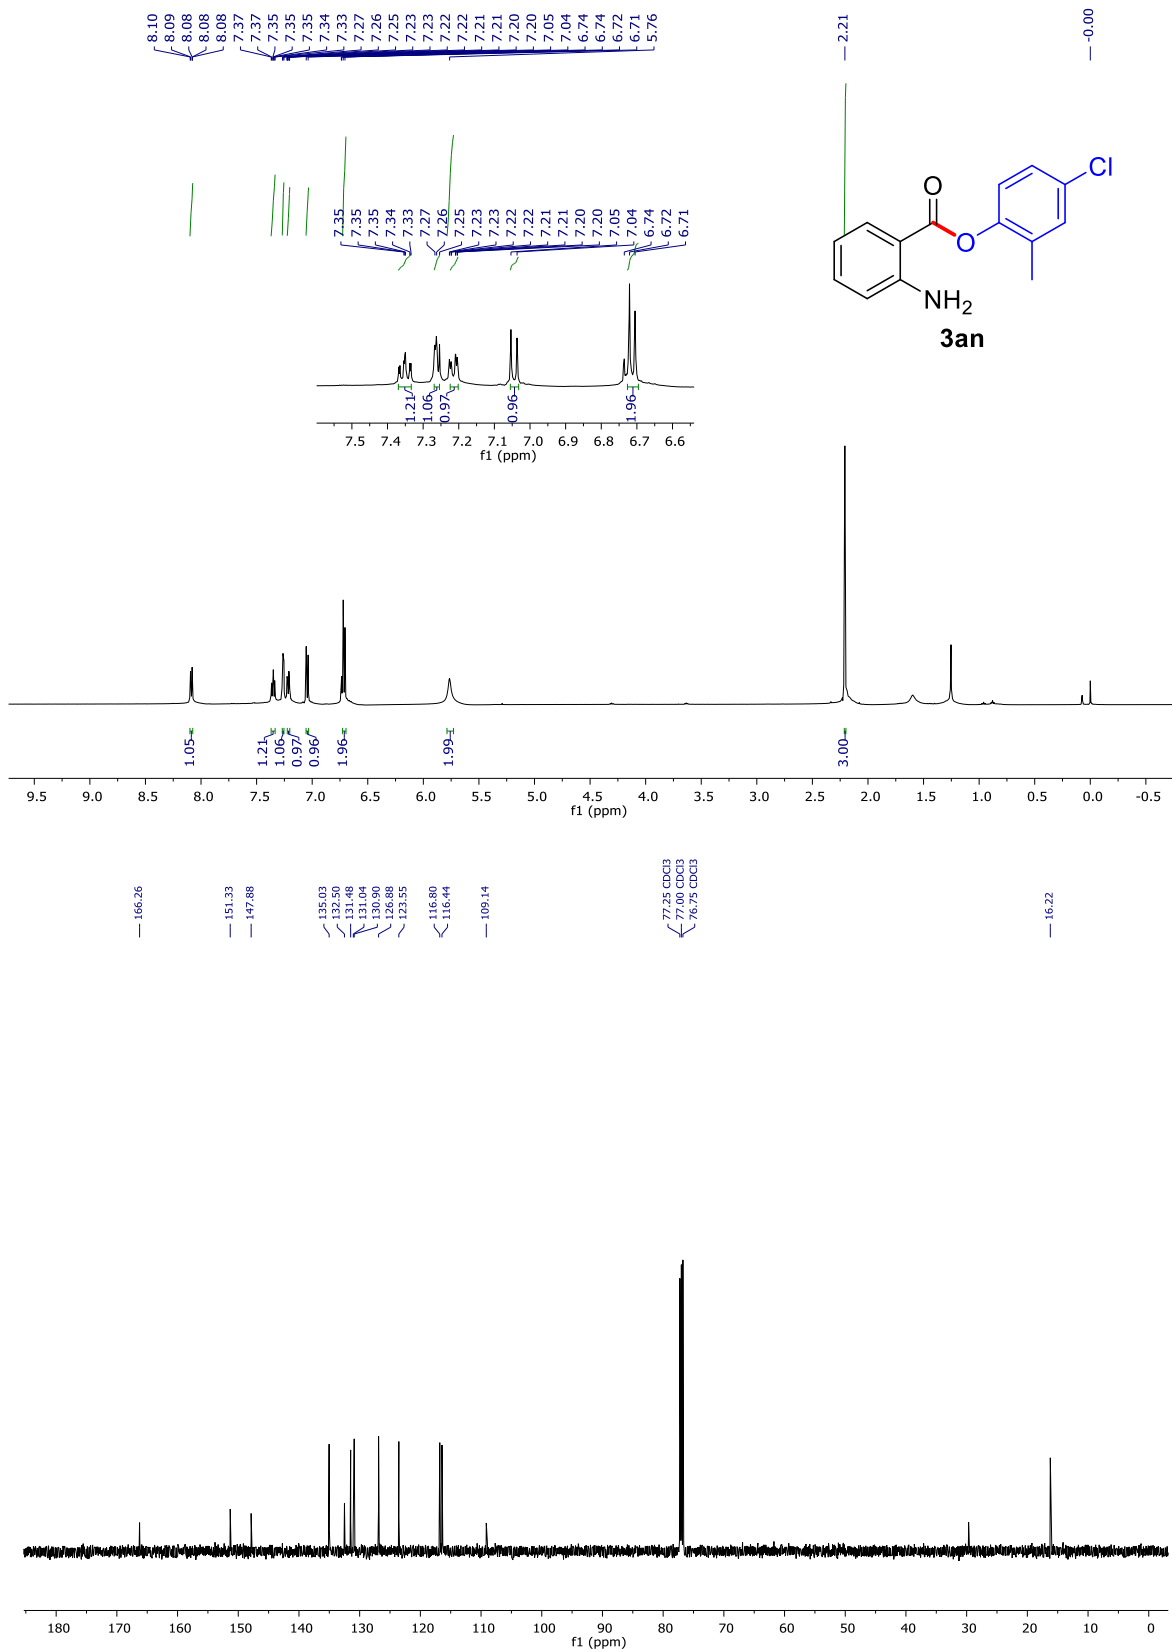

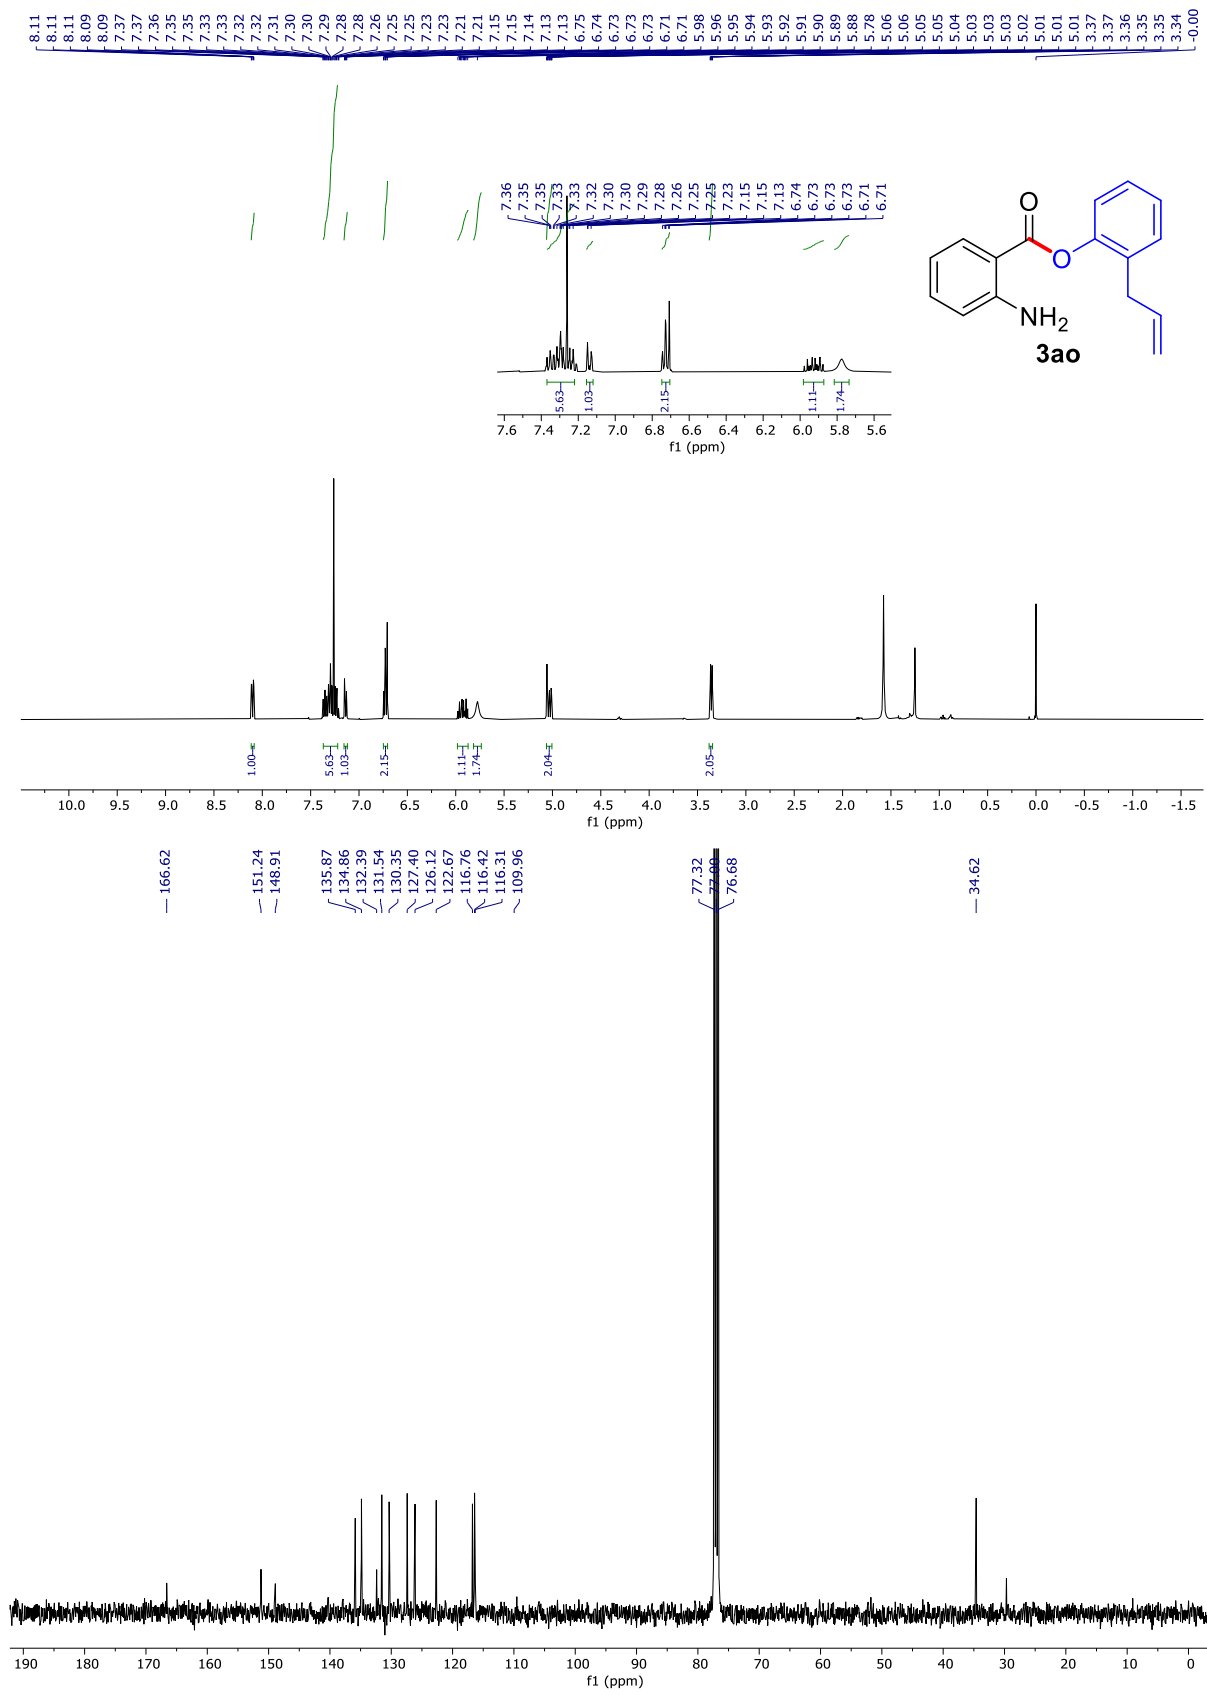

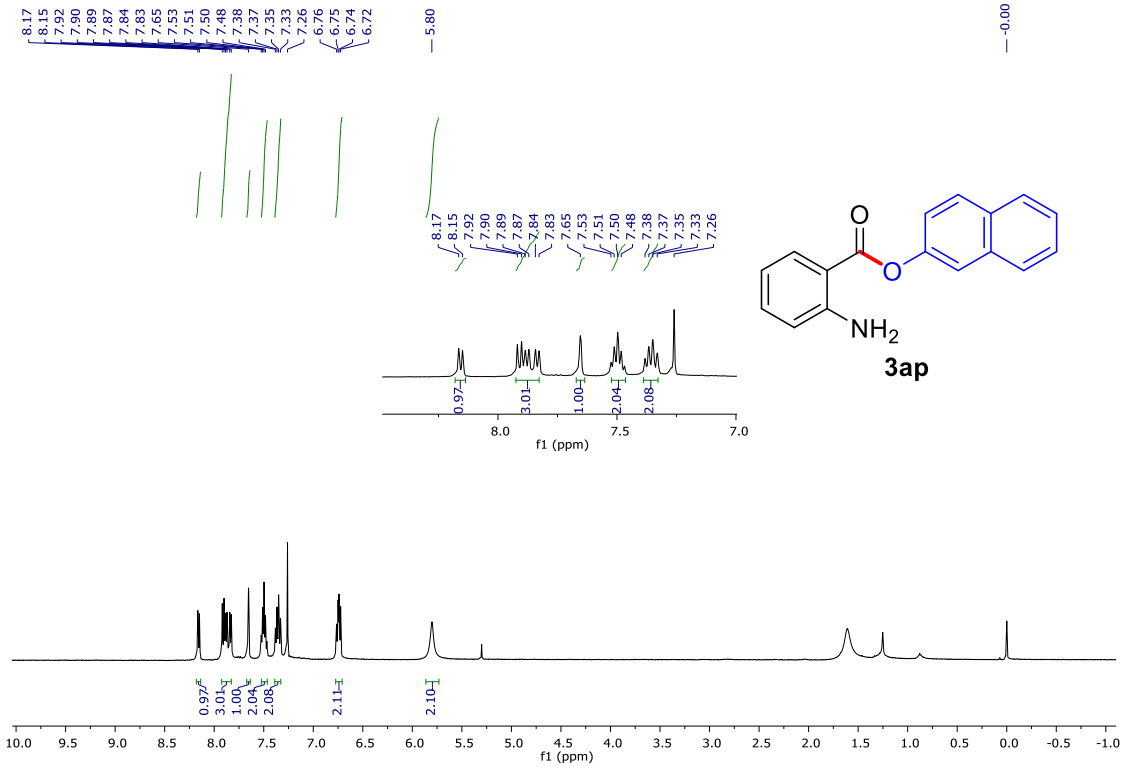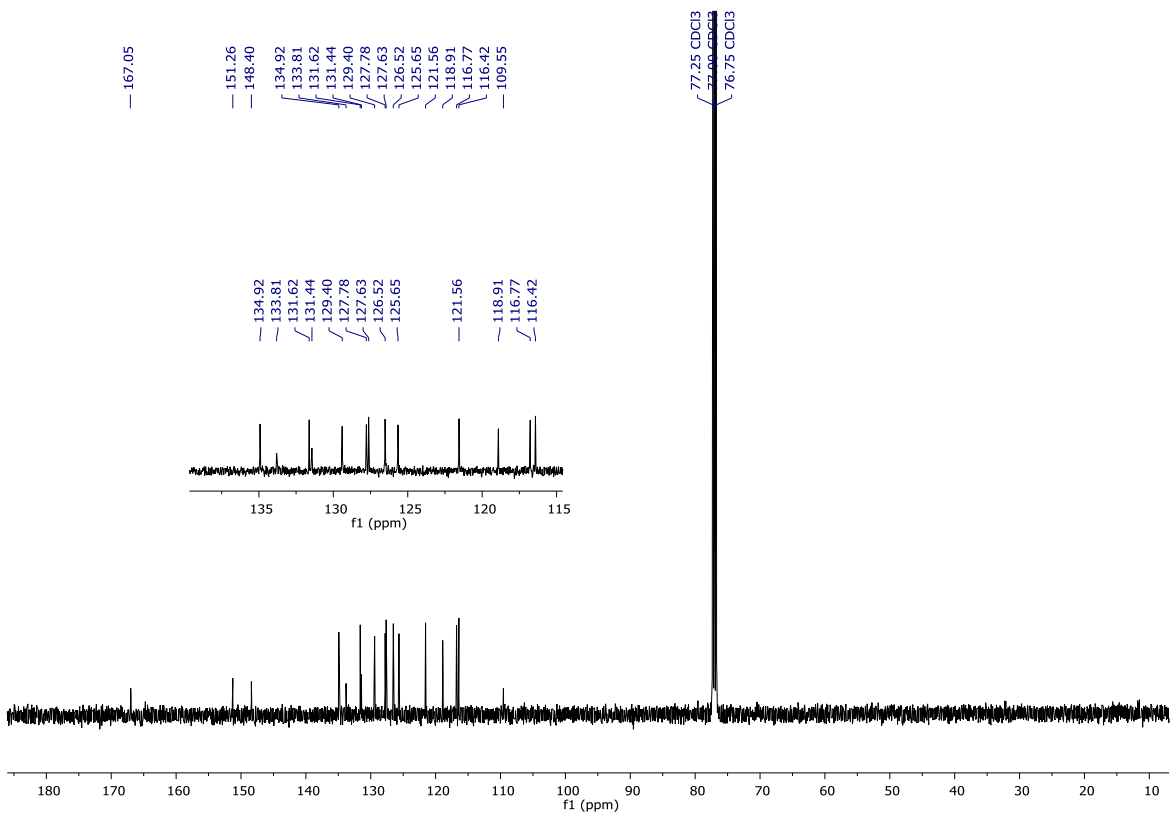

**Test for evolution of CO gas:** (Reference: *Angew. Chem. Int. Ed.* **2018**, 57,456-460)

PdCl<sub>2</sub> (200 mg) was dissolved in two drops of conc. HCl and diluted with 10 mL of distilled water. A cold saturated solution of phosphomolybdic acid in water was prepared separately. These two solutions were then mixed in a separate vial in 1:2 (PMA: PdCl<sub>2</sub>) ratio. Some narrow pieces of filter papers were then dipped in this PMA: PdCl<sub>2</sub> solution and then these were dried at room temperature for 1 hour. In a round bottom flask, isatoic anhydride (**1a**, 0.5 mmol), salicylaldehyde (**2a**, 0.5 mmol), [RuCl<sub>2</sub>(*p*-cymene)]<sub>2</sub> (2.5 mol %), CsOAc (0.5 mmol) in toluene (4.0 mL) were added. Then, one strip of the above dried filter paper was fitted inside the round bottom flask with the help of a septum as shown in the pictures below. The reaction mixture was then heated at 95 °C. After 1.5 hours of heating, it was observed that the yellow colour of the strip was changed to dark-blue colour, indicating the evolution of CO gas from the reaction mixture.

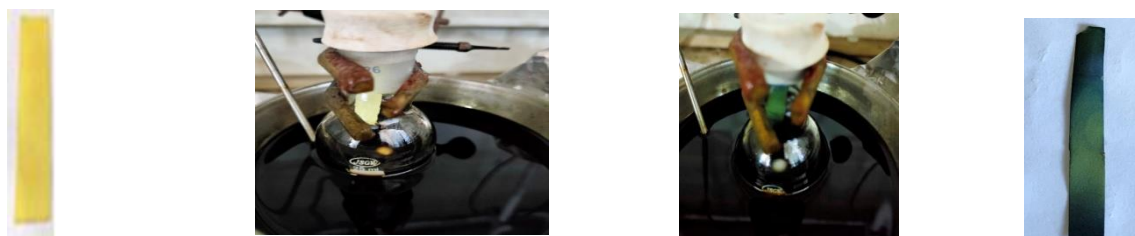

(a) Dried PMA-PdCl<sub>2</sub> (b) Strip before the reaction (c) During the reaction (d) After the reaction

**Figure S1:** Test for evolution of CO gas in the reaction mixture
